# Supplementary material for: What is the general Chinese public’s awareness of and attitudes towards Helicobacter pylori screening and associated health behaviours? A cross-sectional study
Source: PubMed Central journal article supplement — BMJ Open. 2022 Jan 25;12(1):e057929. doi: 10.1136/bmjopen-2021-057929 (PMC8796245; doi:10.1136/bmjopen-2021-057929), 2022-01-25
Supplement: bmjopen-2021-057929.draft_revisions.pdf [file bmjopen-2021-057929.draft_revisions.pdf]

# BMJ Open

BMJ Open is committed to open peer review. As part of this commitment we make the peer review history of every article we publish publicly available.

When an article is published we post the peer reviewers' comments and the authors' responses online. We also post the versions of the paper that were used during peer review. These are the versions that the peer review comments apply to.

The versions of the paper that follow are the versions that were submitted during the peer review process. They are not the versions of record or the final published versions. They should not be cited or distributed as the published version of this manuscript.

BMJ Open is an open access journal and the full, final, typeset and author-corrected version of record of the manuscript is available on our site with no access controls, subscription charges or pay-per-view fees (<http://bmjopen.bmj.com>).

If you have any questions on BMJ Open's open peer review process please email [info.bmjopen@bmj.com](mailto:info.bmjopen@bmj.com)

# BMJ Open

## Awareness and attitudes towards *Helicobacter pylori* screening and health-related behaviors among the general public in China: a cross-sectional study

|                               |                                                                                                                                                                                                                                                                                                                                                                                                                                                                                                                                                                                                                                                                                                                                                                                                                                                                                                                                                                                                                                                                                                                                                                                                                                                                                                                                                                                                                                                                                |
|-------------------------------|--------------------------------------------------------------------------------------------------------------------------------------------------------------------------------------------------------------------------------------------------------------------------------------------------------------------------------------------------------------------------------------------------------------------------------------------------------------------------------------------------------------------------------------------------------------------------------------------------------------------------------------------------------------------------------------------------------------------------------------------------------------------------------------------------------------------------------------------------------------------------------------------------------------------------------------------------------------------------------------------------------------------------------------------------------------------------------------------------------------------------------------------------------------------------------------------------------------------------------------------------------------------------------------------------------------------------------------------------------------------------------------------------------------------------------------------------------------------------------|
| Journal:                      | <i>BMJ Open</i>                                                                                                                                                                                                                                                                                                                                                                                                                                                                                                                                                                                                                                                                                                                                                                                                                                                                                                                                                                                                                                                                                                                                                                                                                                                                                                                                                                                                                                                                |
| Manuscript ID                 | bmjopen-2021-057929                                                                                                                                                                                                                                                                                                                                                                                                                                                                                                                                                                                                                                                                                                                                                                                                                                                                                                                                                                                                                                                                                                                                                                                                                                                                                                                                                                                                                                                            |
| Article Type:                 | Original research                                                                                                                                                                                                                                                                                                                                                                                                                                                                                                                                                                                                                                                                                                                                                                                                                                                                                                                                                                                                                                                                                                                                                                                                                                                                                                                                                                                                                                                              |
| Date Submitted by the Author: | 06-Oct-2021                                                                                                                                                                                                                                                                                                                                                                                                                                                                                                                                                                                                                                                                                                                                                                                                                                                                                                                                                                                                                                                                                                                                                                                                                                                                                                                                                                                                                                                                    |
| Complete List of Authors:     | <p>Wang, Ying-xin ; University of South China, Hengyang Medical School, School of Nursing</p> <p>Zou, Jin-yu; University of South China, Hengyang Medical School, School of Nursing</p> <p>Hu, Li-feng; University of South China, Hengyang Medical School, School of Nursing</p> <p>Liu, Qi; University of South China, Hengyang Medical School, School of Nursing; The Hong Kong Polytechnic University, School of Nursing</p> <p>Huang, Ruo-lin ; University of South China, Hengyang Medical School, School of Nursing</p> <p>Tang, Tian; University of South China, Hengyang Medical School, School of Nursing</p> <p>Yue, Qian-qian; University of South China, Hengyang Medical School, School of Nursing</p> <p>Sun, Ying-xue; University of South China, Hengyang Medical School, School of Nursing</p> <p>Xiao, Qiao; University of South China, Hengyang Medical School, School of Nursing</p> <p>Zeng, Xi ; University of South China, Hengyang Medical School, Hunan Province Key Laboratory of Tumor Cellular &amp; Molecular Pathology, Cancer Research Institute; University of South China, Hengyang Medical School, Hunan Province Cooperative innovation Center for Molecular Target New Drug Study</p> <p>Zeng, Ying ; University of South China, Hengyang Medical School, School of Nursing; University of South China, Hengyang Medical School, Hunan Province Key Laboratory of Tumor Cellular &amp; Molecular Pathology, Cancer Research Institute</p> |
| Keywords:                     | Public health < INFECTIOUS DISEASES, Infection control < INFECTIOUS DISEASES, Gastrointestinal tumours < ONCOLOGY                                                                                                                                                                                                                                                                                                                                                                                                                                                                                                                                                                                                                                                                                                                                                                                                                                                                                                                                                                                                                                                                                                                                                                                                                                                                                                                                                              |
|                               |                                                                                                                                                                                                                                                                                                                                                                                                                                                                                                                                                                                                                                                                                                                                                                                                                                                                                                                                                                                                                                                                                                                                                                                                                                                                                                                                                                                                                                                                                |

SCHOLARONE™  
Manuscripts

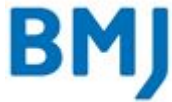

I, the Submitting Author has the right to grant and does grant on behalf of all authors of the Work (as defined in the below author licence), an exclusive licence and/or a non-exclusive licence for contributions from authors who are: i) UK Crown employees; ii) where BMJ has agreed a CC-BY licence shall apply, and/or iii) in accordance with the terms applicable for US Federal Government officers or employees acting as part of their official duties; on a worldwide, perpetual, irrevocable, royalty-free basis to BMJ Publishing Group Ltd ("BMJ") its licensees and where the relevant Journal is co-owned by BMJ to the co-owners of the Journal, to publish the Work in this journal and any other BMJ products and to exploit all rights, as set out in our [licence](#).

The Submitting Author accepts and understands that any supply made under these terms is made by BMJ to the Submitting Author unless you are acting as an employee on behalf of your employer or a postgraduate student of an affiliated institution which is paying any applicable article publishing charge ("APC") for Open Access articles. Where the Submitting Author wishes to make the Work available on an Open Access basis (and intends to pay the relevant APC), the terms of reuse of such Open Access shall be governed by a Creative Commons licence – details of these licences and which [Creative Commons](#) licence will apply to this Work are set out in our licence referred to above.

Other than as permitted in any relevant BMJ Author's Self Archiving Policies, I confirm this Work has not been accepted for publication elsewhere, is not being considered for publication elsewhere and does not duplicate material already published. I confirm all authors consent to publication of this Work and authorise the granting of this licence.

1  
2  
3 **Awareness and attitudes towards Helicobacter pylori screening and health-related**  
4 **behaviors among the general public in China: a cross-sectional study**  
5  
6  
7

8 **Authors:** Ying-xin Wang<sup>1\*</sup>, Jin-yu Zou<sup>1\*</sup>, Li-feng Hu<sup>1</sup>, Qi Liu<sup>1,4</sup>, Ruo-lin Huang<sup>1</sup>,  
9  
10 Tian Tang<sup>1</sup>, Qian-qian Yue<sup>1</sup>, Ying-xue Sun<sup>1</sup>, Qiao Xiao<sup>1</sup>, Xi Zeng<sup>2,3\*</sup>, Ying Zeng<sup>1,2\*</sup>.  
11  
12

13 1. Department of International and Humanistic Nursing, School of Nursing,  
14  
15 Hengyang Medical School, University of South China, Hengyang, China.  
16

17  
18 2. Hunan Province Key Laboratory of Tumor Cellular & Molecular Pathology,  
19  
20 Cancer Research Institute, Hengyang Medical School, University of South China,  
21  
22 Hengyang, China.  
23

24  
25  
26 3. Hunan Province Cooperative innovation Center for Molecular Target New Drug  
27  
28 Study, Hengyang Medical School, University of south china, Hengyang, China.  
29

30  
31 4. School of Nursing, The Hong Kong Polytechnic University, Kowloon, Hong Kong  
32

33  
34 \*These authors have contributed equally to this work.  
35

36 Correspondence to Ying Zeng, E-mail: zengying2003@126.com; Xi Zeng, E-mail:  
37  
38 zx397@126.com.  
39

40  
41 **Author details**  
42

43  
44 Ying-xin Wang, Postgraduate, RN. School of Nursing, University of South China,  
45  
46 Hengyang, China. E-mail:1574567070@qq.com  
47

48  
49 **Corresponding author 1:** Ying Zeng, RN, PhD, Associate Professor. Department of  
50  
51 International and Humanistic Nursing, School of Nursing, Hengyang Medical School,  
52  
53 University of South China, Hengyang, PR China. Tel: +86 17773486339, E-mail:  
54  
55 zengying2003@126.com Fax: 0734-8281344  
56  
57

58  
59 **Corresponding author 2:** Xi Zeng, MD, PhD, Professor, Hunan Province Key  
60

1  
2  
3  
4 Laboratory of Tumor Cellular & Molecular Pathology, Cancer Research Institute,  
5  
6 Hengyang Medical School, University of South China, Hengyang, China. Tel: +86  
7  
8  
9 17773486769, E-mail: zx397@126.com.

10  
11 Ying-xin Wang, Postgraduate, RN. E-mail: 1574567070@qq.com

12  
13 Jin-yu Zou, Postgraduate, RN. E-mail: 1395027157@qq.com

14  
15 Li-feng Hu, Postgraduate, RN. E-mail: 2889113208@qq.com

16  
17 Qi Liu, Postgraduate, RN. E-mail: 1570364856@qq.com.

18  
19 Ruo-lin Huang, Postgraduate, RN. E-mail: 2412596805@qq.com

20  
21 Tian Tang, Postgraduate, RN. E-mail: 1981313616@qq.com

22  
23 Qian-qian Yue, Postgraduate, RN. E-mail: 1835301002@qq.com

24  
25 Ying-xue Sun, Postgraduate, RN. E-mail: 221332812@qq.com

26  
27 Qiao Xiao, Postgraduate, E-mail: 2838699068@qq.com

28  
29  
30  
31  
32  
33  
34  
35 **Word count** 4604

36  
37  
38  
39  
40  
41  
42  
43  
44  
45  
46  
47  
48  
49  
50  
51  
52  
53  
54  
55  
56  
57  
58 **Awareness and attitudes towards Helicobacter pylori screening and health-related**  
59 **behaviors among the general public in China: a cross-sectional study**  
60

## Abstract

**Objective:** To evaluate the general population's awareness, attitudes towards *Helicobacter pylori* screening and health-related behaviors.

**Setting:** Hengyang, Hunan province of China

**Participants:** With the method of stratified cluster random sampling method, a pre-tested structured questionnaire was used to interview the general population aged  $\geq 18$  years old.

**Design:** A cross-sectional study

**Primary and secondary outcome measures:** Knowledge, attitude of HP screening and health-related behaviors, socio-demographic factors associated with HP knowledge and screening behavior.

**Results:** This study involved 1042 participants. The average score of knowledge was 11 ( $Q_L=4$ ,  $Q_U=20$ , range 0-29). About 68.9% of the participants said they had heard of HP, but there were still 703 (67.5%) who had never taken HP test. The most common reasons for not accepting screening include "no symptoms (55.7%)" and "lacking of knowledge about benefits of the test (21.1%)". Independent factors related to knowledge included gender, age, education level, occupation, HP infection, stress status, dining out, use of serving spoons and chopsticks and smoking ( $p < 0.05$ ). Factors independently associated with screening behavior included occupation, average monthly income, indigestion, stomach discomfort or pain, stomach disease and knowledge scores ( $p < 0.05$ ). Besides, 941 (90.3%) participants never used anti-HP toothpaste and 442 (40.5%) never used serving spoons and chopsticks at all. This study found that the risk factors of HP infection included eating out and group eating ( $p < 0.05$ ).

**Conclusion:** In China, general population have poor knowledge about HP, but most people have a positive attitude towards HP screening. Being asymptomatic and lacking of knowledge about test are the main reasons for their reported reluctance to be screened. These results highlight the urgent need for educational activities to raise awareness and screening rates of HP and encourage people to have a healthy lifestyle.

**Keywords:** *Helicobacter pylori* screening, general population, awareness, health-related behaviors, gastric cancer

## Strengths and limitations of this study

- In this study, a quantitative method was used to evaluate the general population's knowledge level of HP, and to explore the screening attitude, behavior, and health behaviors related to HP infection.
- The results may be used as a reference for other countries with high HP infection rate and no screening program.
- Since the participants' information were self-reported, there may be recall bias.
- Only quantitative studies were used, other factors related to screening behavior were not explored, such as culture and health beliefs.

## Introduction

*Helicobacter pylori* (*H.pylori*, HP) is a major risk factor for chronic gastritis, gastric

1  
2  
3  
4 cancer and peptic ulcer<sup>1</sup>. The main mechanism of transmission is family transmission<sup>2</sup>,  
5 and HP infection has become a global public health problem<sup>1</sup>. The total global infection  
6 rate of HP is 44.3%, which is 50.8% in developing countries and 34.7% in developed  
7 countries<sup>3</sup>. About 4.4 billion people were infected with HP worldwide in 2015, among  
8 whom about 700 million were in China. The total HP infection rate in China was 55.8%,  
9 higher than the mean prevalence of the world<sup>1</sup>.

10  
11  
12  
13  
14  
15 Gastric cancer is the fifth most common malignant tumor and the third most  
16 common cause of cancer death worldwide, with a relatively poor prognosis and a  
17 serious threat to human health<sup>4</sup>. Particularly, most of the gastric cancer found in China  
18 are in advanced stage<sup>5</sup>. The Kyoto global consensus<sup>6</sup> points out that HP infection is  
19 closely related to gastric cancer, and eradication of HP at any stage of gastritis is  
20 beneficial to reduce the incidence of gastric cancer<sup>7</sup>. A meta-analysis showed that  
21 eradication of H.pylori was particularly beneficial for asymptomatic patients and  
22 patients following endoscopic resection for early cancer, reducing the risk of gastric  
23 cancer by 34% after eradication<sup>8</sup>. Therefore, improving the screening rate of HP and  
24 early diagnosis and treatment are essential for the prevention of gastric cancer.

25  
26  
27  
28  
29  
30  
31  
32  
33  
34  
35 However, there are no national policy or protocols for HP in gastric cancer  
36 screening in China<sup>9</sup>, although eradication of H.pylori to prevent gastric cancer has a  
37 cost-benefit ratio advantage<sup>10</sup>. HP infection is asymptomatic in most people<sup>11</sup>.  
38 Moreover, China has a large population and relatively poor medical and health  
39 resources, so opportunistic screening of asymptomatic people is the main practice in  
40 China<sup>12,13</sup>. Opportunistic screening is done on a voluntary basis, depending on the  
41 individual or physician's request<sup>14</sup>. And the screening rate of HP in China, 21.7%, is far  
42 away from satisfactory level<sup>15</sup>. However, the general population's lack of awareness of  
43 disease risk factors or symptoms and negative screening attitude will lead to delays in  
44 diagnosis<sup>9</sup>.

45  
46  
47  
48  
49  
50  
51  
52  
53  
54  
55  
56  
57  
58  
59  
60  
Some studies<sup>15-21</sup> showed that people's awareness of HP was poor. When  
participants were asked if they had heard of HP, only 22% to 35% of the respondents  
answered "Yes"<sup>17,21</sup>. Another study<sup>22</sup> showed that only 37% of residents thought they  
had enough knowledge about HP, and only a small number would consider being tested

1  
2  
3  
4 for HP when they do not have specific upper gastrointestinal symptoms. Xia et al<sup>21</sup>  
5 study showed that only 2% of participants who were diagnosed with HP said they had  
6 been tested for HP. Besides, it is reported that 69.8% of the participants had at least one  
7 living habit associated with HP infection<sup>15</sup>. Moreover, the level of awareness is not only  
8 an important factor affecting the screening rate of HP, but also an important prerequisite  
9 for healthy behavior<sup>15,18,23</sup>. Thus, it is critical to improve the knowledge level of HP and  
10 health behavior to improve HP screening rate to promote the primary prevention of  
11 gastric cancer.  
12  
13  
14  
15  
16  
17  
18

19 In China, there is little information about the general population's knowledge and  
20 screening intention of HP. Hence, this study aimed to evaluate the general population's  
21 awareness of HP and their attitudes towards HP screening, and investigate the health-  
22 related behaviors and factors related to HP knowledge and screening behavior.  
23  
24  
25  
26  
27  
28

## 29 **Methods**

### 30 *Setting and sample*

31 This was a cross-sectional study conducted between June and October 2020. The  
32 minimum sample size was calculated to be 760 using the formula  $N = [\mu_a^2 \times \pi \times (1 - \pi)] / \delta^2$ <sup>24</sup>,  
33 in which the prevalence rate of 21.7% ( $\pi$ ) was based on the screening rate of HP in the  
34 general population, the significance level was 0.05 ( $\alpha$ ) and the allowable error was 0.03  
35 ( $\delta$ ). Considering the 40% non-response rate and response rate of the questionnaires, the  
36 final sample size was determined to be 1016.  
37  
38  
39  
40  
41  
42  
43  
44

45 Using stratified cluster random sampling method, 12 community health service  
46 centers were randomly selected from 22 community health service centers in Hengyang  
47 city. According to the proportion, every center involved in 85 participants visiting the  
48 community health service center. We sought 12 interviewers with medical background  
49 and experience of scene investigation, and they were trained in HP related knowledge  
50 and interview skills in detail. Each trained interviewer is accompanied by a medical  
51 staff (doctor or nurse) with the support of a community health service center to  
52 introduce the purpose. Inclusion criteria were (a)  $\geq 18$  years of age, (b) able to  
53  
54  
55  
56  
57  
58  
59  
60



1  
2  
3  
4 communicate effectively, and (c) voluntary participation. The exclusion criteria was  
5 diagnosed with gastric cancer.  
6  
7

### 8 9 *Study instrument*

10 The questionnaire included items on awareness, attitudes and health-related behaviors  
11 about HP. The survey items were identified through a literature review and expert  
12 consultation, including international and domestic consensus<sup>6,10</sup>. The questionnaire  
13 comprised four parts: (1) Socio-demographic characteristics, including gender,  
14 residence, marital status, education level, occupation, income, family history of gastric  
15 cancer, and HP infection, etc. (2) The second part included 23 questions about  
16 knowledge of the harm of HP, methods and benefits of the treatment, transmission  
17 routes, detection methods, prevention methods and identification of HP treatment.  
18 There were 23 items in total, of which 21 items were single choice, and 2 multiple  
19 choice questions. The scoring was 1 point for each correct answer and 0 point for the  
20 wrong answer or 'don't know' with a total score of 29 points. The respondents'  
21 knowledge level was then categorized into the total scores: 21-29 points, high  
22 knowledge; 9-20 points, moderate knowledge; and 0-8 points, low knowledge<sup>25</sup>. (3)  
23  
24 The third section was about perceptions on the HP detection including 9 questions: (i)  
25 'Do you think HP infection can be prevented?' Options included "yes", "no", and "don't  
26 know". (ii) 'Do you think HP infection can be cured?' (yes, no, or don't know). (iii)  
27 'Have you ever been tested for HP?' (yes or no). (iv) 'Do you think the HP test can  
28 accurately detect the presence of HP infection?' (yes, no, or don't know). (v) 'Which  
29 HP test do you prefer?' Options include '13C-urea breath test', 'stool tests', 'blood  
30 tests', 'endoscopic biopsies', 'none acceptable', 'don't know'. (vi) 'Did the doctor  
31 discuss with you about testing for HP?' Options include 'yes', 'no' or 'I don't  
32 remember'. (vii) 'Would you like to undertake test of HP?' (yes or no). (viii) 'Why don't  
33 you want to undertake test of HP?' Options include lacking of knowledge about the  
34 benefits of the test, confirming the disease would induce psychological burden, no  
35 symptoms, lacking of time, economic reason, and others. (ix) 'If your test result for HP  
36  
37  
38  
39  
40  
41  
42  
43  
44  
45  
46  
47  
48  
49  
50  
51  
52  
53  
54  
55  
56  
57  
58  
59  
60

1  
2  
3 is positive, are you willing to receive treatment?'(yes or no). (4) Health-related  
4 behaviors: participants were asked to choose the option that best matched to their daily  
5 habits including salty diet, pickles, vegetables, fruits and sweets intake, the use of anti-  
6 HP toothpaste, brushing teeth, drinking well water and river water, eating regularly,  
7 eating out, group meals and use of serving spoons and chopsticks, household tableware  
8 disinfection, hand washing, smoking, and drinking alcohol.  
9

10 The reliability of the questionnaire was assessed by pre-testing in 100 adults. The  
11 internal consistency of the questionnaires was accomplished by estimating the  
12 Cronbach's alpha based on the recommendation of  $>0.70$ . The Cronbach's alpha  
13 calculated was 0.84. The validity of the questionnaire was evaluated by structural  
14 validity, using the method of exploratory factor analysis. The KMO value calculated  
15 was 0.886, and the cumulative variance contribution rate was 70%. Finally, based on  
16 the feedback from the pre-test, the questionnaire was revised and re-evaluated to suit  
17 the study population.  
18  
19  
20  
21  
22  
23  
24  
25  
26  
27  
28  
29

### 30 *Data analysis*

31 The data was analyzed by using SPSS V.23. Socio-demographic characteristics and  
32 answers of each question were described in terms of frequency and percentage.  
33 Associations between socio-demographic characteristics and H.pylori knowledge and  
34 screening behavior as well as associations between participants' health-related  
35 behaviors and H.pylori infection were analyzed using the chi-square test or Fisher's  
36 exact test. The variables of  $P \leq 0.15$  in univariate analysis were entered into multivariate  
37 logistic regression analysis to investigate the independent factors affecting knowledge,  
38 behavior and H.pylori infection. Only the results of the multivariate analysis were  
39 presented using odds ratios (OR) and 95% confidence intervals (CI), and  $p < 0.05$  was  
40 regarded as statistically significant.  
41  
42  
43  
44  
45  
46  
47  
48  
49  
50  
51

### 52 *Patient and public involvement*

53 No patients were involved in the design or development of the study questions and  
54 outcome measures. They were also not involved in the recruitment and implementation  
55 of the study. The results will be sent to participants interested in this subject via text  
56  
57  
58  
59  
60

message.

### *Ethics approval*

This study was approved by the [details removed for peer review] and participants' informed consent were obtained before participation.

## **Results**

### *Socio-demographic characteristics of the 1042 general population*

From June to October 2020, a total of 1100 individuals consented to involve in the study. After removing the questionnaires with incomplete answers, 1042 valid questionnaires were obtained. Thus, the final response rate was 95%. The mean age of the participants was  $35.40 \pm 13.3$  years (range=18-78 years). Of the total sample, more than half (62.6%) were women, 47% had high school education or below, 61.4% lived in rural areas and 48% had low income. Among the participants, 67(6.4%) had a family history of gastric cancer, 501(48.1%) had symptoms of dyspepsia, stomach discomfort or pain, 124(11.9%) had HP infection, and 255(24.5%) had a definite diagnosis of gastric disease. Other variables are listed in (Table 1).

**Table 1 Participant characteristics (n=1042)**

| Characteristics                                | N (%)      |
|------------------------------------------------|------------|
| Gender                                         |            |
| Male                                           | 390 (37.4) |
| Female                                         | 652 (62.6) |
| Ages (years)                                   |            |
| 18-36                                          | 584 (56.0) |
| 36-60                                          | 412 (39.5) |
| $\geq 60$                                      | 46 (4.5)   |
| Education level                                |            |
| Primary school and below                       | 86 (8.3)   |
| Secondary school or technical secondary school | 403 (38.7) |
| University or junior college                   | 486 (46.6) |
| Graduate student or above                      | 67 (6.4)   |
| Occupation                                     |            |
| State functionary                              | 60 (5.8)   |

|    |                                         |            |
|----|-----------------------------------------|------------|
| 1  |                                         |            |
| 2  |                                         |            |
| 3  | Company staff                           | 185 (17.8) |
| 4  | Teacher                                 | 73 (7.0)   |
| 5  | Medical staff                           | 103 (9.9)  |
| 6  | Worker                                  | 79 (7.6)   |
| 7  | Farmer                                  | 117 (11.2) |
| 8  | Self-employed                           | 75 (7.2)   |
| 9  | Student                                 | 194 (18.6) |
| 10 | Other                                   | 156 (15.0) |
| 11 | Marital status                          |            |
| 12 | Single                                  | 378 (36.3) |
| 13 | Married                                 | 678 (61.2) |
| 14 | Divorced                                | 13 (1.2)   |
| 15 | Widowed                                 | 13 (1.2)   |
| 16 | Residence                               |            |
| 17 | Urban                                   | 640 (61.4) |
| 18 | Rural                                   | 402 (38.6) |
| 19 | Income (¥)                              |            |
| 20 | < 3000                                  | 500 (48.0) |
| 21 | 3000-5000                               | 302 (29.0) |
| 22 | 5000-10000                              | 187 (17.9) |
| 23 | ≥10000                                  | 53 (5.1)   |
| 24 | Family history of gastric cancer        |            |
| 25 | Yes                                     | 67 (6.4)   |
| 26 | No                                      | 975 (93.6) |
| 27 | Health status                           |            |
| 28 | Unhealthy                               | 374 (35.9) |
| 29 | Suboptimal                              | 605 (58.1) |
| 30 | Healthy                                 | 63 (6.0)   |
| 31 | Indigestion, stomach discomfort or pain |            |
| 32 | Yes                                     | 501 (48.1) |
| 33 | No                                      | 541 (51.9) |
| 34 | Helicobacter pylori infection           |            |
| 35 | Yes                                     | 124 (11.9) |
| 36 | No                                      | 215 (20.6) |
| 37 | Undetected                              | 703 (67.5) |
| 38 | Related diseases of stomach             |            |
| 39 | Yes                                     | 255 (24.5) |
| 40 | No                                      | 600 (57.6) |
| 41 | Don't know                              | 187 (17.9) |
| 42 | Stress                                  |            |
| 43 | No stress                               | 161 (15.5) |
| 44 | Low                                     | 237 (22.7) |
| 45 | Moderate                                | 545 (52.3) |
| 46 |                                         |            |
| 47 |                                         |            |
| 48 |                                         |            |
| 49 |                                         |            |
| 50 |                                         |            |
| 51 |                                         |            |
| 52 |                                         |            |
| 53 |                                         |            |
| 54 |                                         |            |
| 55 |                                         |            |
| 56 |                                         |            |
| 57 |                                         |            |
| 58 |                                         |            |
| 59 |                                         |            |
| 60 |                                         |            |

High

99 (9.5)

*Knowledge about helicobacter pylori in the general population*

Table 2 presents the participants' knowledge of HP including general knowledge, awareness of HP detection and prevention, and timing of screening and treatment. The average score of knowledge was 11 ( $Q_L=4$ ,  $Q_U=20$ , range 0-29). Of the 1042 respondents, 450 (43.2%), 348 (33.4%) and 244 (23.4%) had low, moderate and high knowledge of HP, respectively. About 718 (68.9%) had heard of HP, however, there were still 703 (67.5%) who had never tested HP. Less than 40% of them thought that H.pylori infection can cause gastritis and other malignancies, treatment of HP infection could prevent gastric cancer. Only 283 (27.2%) knew the treatment of HP. Less than half of the participants knew that H.pylori could be transmitted by fecal-oral or oral transmission. Participants were less aware of the three HP detection methods: blood test (17.2%), stool test (29.5%), and gastroscopy biopsy (33.9%). The most recognized indications for screening and treatment was H.pylori infection (55.9%), followed by chronic gastritis (47.0%-47.4%), and peptic ulcer (47.0%). Less well-recognized indications was long-term use of proton pump inhibitors (24.3%), planned long-term use of non-steroidal anti-inflammatory drugs (22.6%), unknown causes of iron deficiency anemia (19.8%), idiopathic thrombocytopenic purpura (17.6%).

Table 3 shows the results of multivariate analysis of factors related to HP knowledge. Univariate analysis showed that sex, age, educational level, occupation, residence, average monthly income, HP infection, stress status, eating out, use of serving spoons and chopsticks, smoking and other factors were significantly associated with HP knowledge ( $p<0.05$ ). These factors plus variables with  $p$  value  $<0.15$  in the univariate analysis were entered into the multivariate logistic regression model. The independent variables related to knowledge included gender, age, education level, occupation, HP infection, stress status, dining out, use of serving spoons and chopsticks and smoking ( $p < 0.05$ , table 3).

Participants who were found to be less knowledgeable about HP include male sex (OR 0.63;95%CI 0.45 to 0.89), with lower educational level (Primary school and below:

OR 0.004; 95%CI 0.001 to 0.03), having no pressure or low pressure (OR 0.26; 95%CI 0.10 to 0.67), never eating out (OR 0.16; 95%CI 0.06 to 0.47), never using serving spoons and chopsticks (OR 0.53; 95%CI 0.31 to 0.94). Participants more knowledgeable about HP include the man aged 36 to 60 (OR 3.16; 95%CI 1.16 to 8.56), Medical professionals (OR 17.68; 95%CI 2.15 to 145.48), never smoking (OR 3.80; 95%CI 1.83 to 7.89). Participants with (OR 4.37; 95%CI 2.44 to 7.82) or without (OR 1.95; 95%CI 1.30 to 2.93) HP infection had better knowledge about HP than those who had never been tested for HP.

**Table 2 Participants' knowledge about helicobacter pylori (n=1042)**

| Category                                                                                                                                                                                                                       | N   | %    |
|--------------------------------------------------------------------------------------------------------------------------------------------------------------------------------------------------------------------------------|-----|------|
| <b>General knowledge</b>                                                                                                                                                                                                       |     |      |
| Have you ever heard of Helicobacter pylori?                                                                                                                                                                                    | 718 | 68.9 |
| Helicobacter pylori infection can cause Helicobacter pylori-related gastritis                                                                                                                                                  | 400 | 38.4 |
| Helicobacter pylori infection can cause other malignant tumors                                                                                                                                                                 | 346 | 33.2 |
| Treatment of Helicobacter pylori infection can prevent gastric cancer                                                                                                                                                          | 388 | 37.2 |
| Untreated Helicobacter pylori infection may lead to gastric cancer                                                                                                                                                             | 473 | 45.4 |
| Helicobacter pylori infection-related gastritis can cause abdominal pain, abdominal distension, acid reflux, belching and other symptoms                                                                                       | 419 | 40.2 |
| Helicobacter pylori infection can be transmitted through fecal-oral transmission                                                                                                                                               | 481 | 46.2 |
| Helicobacter pylori infection can be transmitted through oral-to-oral                                                                                                                                                          | 506 | 48.6 |
| The main treatments for Helicobacter pylori infection are: two antibiotics (such as amoxicillin + clarithromycin) + proton pump inhibitors (such as omeprazole or pantoprazole) + bismuth (such as bismuth potassium citrate). | 283 | 27.2 |
| <b>Awareness of Helicobacter pylori detection and prevention</b>                                                                                                                                                               |     |      |
| Which of the following methods can detect Helicobacter pylori infection? (multiple selections possible)                                                                                                                        |     |      |
| 13C-urea breath test                                                                                                                                                                                                           | 529 | 50.8 |
| Stool tests                                                                                                                                                                                                                    | 307 | 29.5 |
| Blood tests                                                                                                                                                                                                                    | 179 | 17.2 |

|                                                                                                       |     |      |
|-------------------------------------------------------------------------------------------------------|-----|------|
| Endoscopic biopsies                                                                                   | 353 | 33.9 |
| Don't know                                                                                            | 368 | 35.3 |
| Which of the following measures can prevent Helicobacter pylori infection?                            |     |      |
| Wash hands before and after meals                                                                     | 678 | 65.1 |
| Use chopsticks and separate meals when eating                                                         | 673 | 64.6 |
| High temperature disinfection of tableware                                                            | 669 | 64.2 |
| Avoid eating dirty water and food                                                                     | 644 | 61.8 |
| Don't know                                                                                            | 296 | 28.4 |
| <b>Timing of screening and treatment:</b>                                                             |     |      |
| Peptic ulcers                                                                                         | 490 | 47.0 |
| Primary malignant lymphoma of stomach                                                                 | 395 | 37.9 |
| Chronic gastritis with dyspepsia                                                                      | 490 | 47.0 |
| Chronic gastritis with atrophy and erosion of gastric mucosa                                          | 494 | 47.4 |
| Early gastric tumors have been resected under endoscope or subtotal gastrectomy.                      | 319 | 30.6 |
| Long-term use of proton pump inhibitors (omeprazole, pantoprazole, etc.)                              | 253 | 24.3 |
| Family history of gastric cancer                                                                      | 428 | 41.1 |
| Plan to take long-term non-steroidal anti-inflammatory drugs (aspirin, celecoxib, indomethacin, etc.) | 236 | 22.6 |
| Iron deficiency anemia of unknown cause                                                               | 206 | 19.8 |
| Idiopathic thrombocytopenic purpura                                                                   | 183 | 17.6 |
| Other Helicobacter pylori related diseases                                                            | 441 | 42.3 |
| Helicobacter pylori infection was confirmed by test.                                                  | 582 | 55.9 |
| <b>Knowledge level (29 points)</b>                                                                    |     |      |
| Low (0-8)                                                                                             | 450 | 43.2 |
| Moderate (9-20)                                                                                       | 348 | 33.4 |
| High (21-29)                                                                                          | 244 | 23.4 |

**Table 3 Logistic multiple regression of factors associated with Helicobacter pylori related knowledge (n=1042)**

| Variable        | $\beta$ | SE    | OR    | 95%CI                 | P             |
|-----------------|---------|-------|-------|-----------------------|---------------|
| Gender          |         |       |       |                       |               |
| Male            | -0.463  | 0.177 | 0.630 | <b>0.445 to 0.891</b> | <b>0.009*</b> |
| Female          |         |       |       | 1 (ref)               |               |
| Ages(years)     |         |       |       |                       |               |
| 18-36           | 0.576   | 0.539 | 1.780 | 0.619 to 5.114        | 0.284         |
| 36-60           | 1.149   | 0.509 | 3.156 | <b>1.164 to 8.558</b> | <b>0.024*</b> |
| $\geq 60$       |         |       |       | 1 (ref)               |               |
| Education level |         |       |       |                       |               |

|    |                        |        |       |       |                        |                   |
|----|------------------------|--------|-------|-------|------------------------|-------------------|
| 1  |                        |        |       |       |                        |                   |
| 2  |                        |        |       |       |                        |                   |
| 3  | Primary school and     |        |       |       |                        |                   |
| 4  | below                  | -5.613 | 1.008 | 0.004 | <b>0.001 to 0.026</b>  | <b>&lt;0.001*</b> |
| 5  |                        |        |       |       |                        |                   |
| 6  | Secondary school or    |        |       |       |                        |                   |
| 7  | technical secondary    | -3.22  | 0.604 | 0.040 | <b>0.012 to 0.131</b>  | <b>&lt;0.001*</b> |
| 8  | school                 |        |       |       |                        |                   |
| 9  |                        |        |       |       |                        |                   |
| 10 | University or junior   |        |       |       |                        |                   |
| 11 | college                | -1.775 | 0.539 | 0.170 | <b>0.059 to 0.488</b>  | <b>0.001*</b>     |
| 12 |                        |        |       |       |                        |                   |
| 13 | Graduate student or    |        |       |       | 1 (ref)                |                   |
| 14 | above                  |        |       |       |                        |                   |
| 15 | Occupation             |        |       |       |                        |                   |
| 16 | State functionary      | 0.455  | 0.390 | 1.576 | 0.734 to 3.382         | 0.243             |
| 17 |                        |        |       |       |                        |                   |
| 18 | Company staff          | 0.312  | 0.276 | 1.366 | 0.795 to 2.349         | 0.259             |
| 19 |                        |        |       |       |                        |                   |
| 20 | Teacher                | 0.562  | 0.377 | 1.754 | 0.838 to 3.669         | 0.136             |
| 21 |                        |        |       |       |                        |                   |
| 22 | Medical staff          | 2.872  | 1.075 | 17.68 | <b>2.149 to 145.48</b> | <b>0.008*</b>     |
| 23 |                        |        |       |       |                        |                   |
| 24 | Worker                 | -0.422 | 0.362 | 0.656 | 0.323 to 1.333         | 0.244             |
| 25 |                        |        |       |       |                        |                   |
| 26 | Farmer                 | 0.529  | 0.324 | 1.698 | 0.900 to 3.201         | 0.102             |
| 27 |                        |        |       |       |                        |                   |
| 28 | Self-employed          | 0.392  | 0.342 | 1.480 | 0.758 to 2.892         | 0.251             |
| 29 |                        |        |       |       |                        |                   |
| 30 | Student                | 0.831  | 0.347 | 2.296 | <b>1.164 to 4.529</b>  | <b>0.017*</b>     |
| 31 |                        |        |       |       |                        |                   |
| 32 | Other                  |        |       |       | 1 (ref)                |                   |
| 33 | Helicobacter pylori    |        |       |       |                        |                   |
| 34 | infection              |        |       |       |                        |                   |
| 35 | Yes                    | 1.474  | 0.297 | 4.369 | <b>2.440 to 7.821</b>  | <b>&lt;0.001*</b> |
| 36 |                        |        |       |       |                        |                   |
| 37 | No                     | 0.669  | 0.207 | 1.953 | <b>1.303 to 2.927</b>  | <b>0.001*</b>     |
| 38 |                        |        |       |       |                        |                   |
| 39 | Undetected             |        |       |       | 1 (ref)                |                   |
| 40 | Stress                 |        |       |       |                        |                   |
| 41 | No stress              | -1.363 | 0.488 | 0.256 | <b>0.098 to 0.666</b>  | <b>0.005*</b>     |
| 42 |                        |        |       |       |                        |                   |
| 43 | Low                    | -0.879 | 0.410 | 0.415 | <b>0.186 to 0.928</b>  | <b>0.032*</b>     |
| 44 |                        |        |       |       |                        |                   |
| 45 | Moderate               | -0.689 | 0.371 | 0.502 | 0.243 to 1.039         | 0.063             |
| 46 |                        |        |       |       |                        |                   |
| 47 | High                   |        |       |       | 1 (ref)                |                   |
| 48 | Eating out             |        |       |       |                        |                   |
| 49 | Never                  | -1.829 | 0.546 | 0.161 | <b>0.055 to 0.468</b>  | <b>0.001*</b>     |
| 50 |                        |        |       |       |                        |                   |
| 51 | Occasionally           | -0.892 | 0.225 | 0.410 | <b>0.264 to 0.637</b>  | <b>&lt;0.001*</b> |
| 52 |                        |        |       |       |                        |                   |
| 53 | Usual                  |        |       |       | 1 (ref)                |                   |
| 54 | Use serving spoons and |        |       |       |                        |                   |
| 55 | chopsticks             |        |       |       |                        |                   |
| 56 | Never                  | -0.627 | 0.286 | 0.534 | <b>0.305 to 0.935</b>  | <b>0.028*</b>     |
| 57 |                        |        |       |       |                        |                   |
| 58 | Occasionally           | 0.166  | 0.268 | 1.181 | 0.698 to 1.998         | 0.535             |
| 59 |                        |        |       |       |                        |                   |
| 60 | Usual                  |        |       |       | 1 (ref)                |                   |
|    | Smoking                |        |       |       |                        |                   |
|    | Never                  | 1.335  | 0.372 | 3.801 | <b>1.832 to 7.888</b>  | <b>&lt;0.001*</b> |
|    |                        |        |       |       |                        |                   |
|    | Ever                   | 1.027  | 0.469 | 2.792 | <b>1.114 to 7.001</b>  | <b>0.029*</b>     |
|    |                        |        |       |       |                        |                   |
|    | At present             |        |       |       | 1 (ref)                |                   |



1  
2  
3 Bold figures indicate the statistically significant findings ( $p < 0.05$ ).  
4 CI, confidence interval; SE, standard error; ref, reference.  
5  
6  
7

#### 8 *Attitudes towards helicobacter pylori screening*

9

10 Table 4 shows the participants' attitudes towards HP screening. A majority of  
11 participants held a positive attitude towards HP screening. More than 60% of them  
12 thought that HP infection could be prevented or cured and HP test could accurately  
13 detect the presence of HP infection. The most commonly acceptable (56.9%) test was  
14 13C-urea breath test, while a small number of people (16%) knew nothing about HP  
15 test. When participants were asked if their doctor have discussed H.pylori test with  
16 them, almost 70% gave a negative answer. However, 72.3% participants indicated that  
17 they would like to undertake test of HP. And 96.3% of participants said they were  
18 willing to receive treatment if they were tested positive for H.pylori. Only 289 (27.7%)  
19 participants were reluctant to undertake test of HP because there were no symptoms  
20 (55.7%) and lack of knowledge about benefits of the test (21.1%).  
21  
22  
23  
24  
25  
26  
27  
28  
29  
30

31 Table 5 shows the results of a multivariate analysis of factors associated with HP  
32 detection behavior. Univariate analysis showed that age, occupation, marital status,  
33 residence, average monthly income, family history of gastric cancer, health status,  
34 indigestion, stomach discomfort or pain, stomach disease and knowledge scores were  
35 related to HP detection behavior. These factors plus variables with p value  $< 0.15$  in the  
36 univariate analysis were entered into the multivariate logistic regression model. The  
37 independent variables related to HP detection behavior included occupation, average  
38 monthly income, indigestion, stomach discomfort or pain, stomach disease and  
39 knowledge scores.  
40  
41  
42  
43  
44  
45  
46  
47  
48

49 Participants who were found less likely to undertake test for HP include workers,  
50 students and farmers (OR 0.925,95%CI 0.867 to 0.988), with low monthly income (OR  
51 0.712,95%CI 0.607 to 0.835) and low knowledge scores (OR 0.602,95%CI 0.507 to  
52 0.716), while those with symptoms of stomach discomfort (OR 1.744,95%CI 1.279 to  
53 2.379) and stomach-related diseases (OR 3.326,95%CI 2.578 to 4.292) were more  
54 likely to undertake HP test .  
55  
56  
57  
58  
59  
60

**Table 4 Helicobacter pylori screening attitudes among participants (n=1042)**

| Question                                                                     | Number | %    |
|------------------------------------------------------------------------------|--------|------|
| Do you think HP infection can be prevented?                                  |        |      |
| Yes                                                                          | 782    | 75.0 |
| No                                                                           | 40     | 3.8  |
| Don't know                                                                   | 220    | 21.1 |
| Do you think HP infection can be cured?                                      |        |      |
| Yes                                                                          | 770    | 73.9 |
| No                                                                           | 49     | 4.7  |
| Don't know                                                                   | 223    | 21.4 |
| Have you ever been tested for HP?                                            |        |      |
| Yes                                                                          | 284    | 27.3 |
| No                                                                           | 758    | 72.7 |
| Do you think the HP test can accurately detect the presence of HP infection? |        |      |
| Yes                                                                          | 698    | 67.0 |
| No                                                                           | 62     | 6.0  |
| Don't know                                                                   | 282    | 27.1 |
| Which HP test do you prefer?                                                 |        |      |
| 13C-urea breath test                                                         | 593    | 56.9 |
| Stool tests                                                                  | 93     | 8.90 |
| Blood tests                                                                  | 133    | 12.8 |
| Endoscopic biopsies                                                          | 35     | 3.4  |
| none acceptable                                                              | 21     | 2.0  |
| don't know                                                                   | 167    | 16.0 |
| Did the doctor discuss with you about testing for HP?                        |        |      |
| Yes                                                                          | 215    | 20.6 |
| No                                                                           | 725    | 69.6 |
| I don't remember                                                             | 102    | 9.8  |
| Would you like to undertake test of HP?                                      |        |      |
| Yes                                                                          | 753    | 72.3 |
| No                                                                           | 289    | 27.7 |
| Why don't you want to undertake test of HP (n=289)*                          |        |      |
| Lacking of knowledge about benefits of the test                              | 61     | 21.1 |
| Confirming the disease would induce psychological burden                     | 22     | 7.6  |
| No symptoms                                                                  | 161    | 55.7 |
| Lacking of time                                                              | 22     | 7.6  |
| Economic reason                                                              | 14     | 4.8  |
| Other                                                                        | 9      | 3.1  |

If your test result for HP is positive, are you willing to receive treatment?

|     |      |      |
|-----|------|------|
| Yes | 1003 | 96.3 |
| No  | 39   | 3.7  |

\*Participants who don't want to undertake test of HP.

HP, helicobacter pylori

**Table 5 Bivariate analysis of factors associated with Helicobacter pylori detection behavior (n=1042)**

| Variable                                       | Screened<br>N (%) | Unscreened<br>N (%) | OR   | 95%CI | P        |
|------------------------------------------------|-------------------|---------------------|------|-------|----------|
| <b>Occupation</b>                              |                   |                     |      |       |          |
| State functionary                              | 21 (35.0)         | 39 (65.0)           |      |       |          |
| Company staff                                  | 51 (27.6)         | 134 (72.4)          |      |       |          |
| Teacher                                        | 21 (28.8)         | 52 (71.2)           |      |       |          |
| Medical staff                                  | 29 (28.2)         | 74 (71.8)           |      |       |          |
| Worker                                         | 14 (17.7)         | 65 (82.3)           | 0.92 | 0.867 | to 0.020 |
| Farmer                                         | 26 (22.2)         | 91 (77.8)           | 5    | 0.988 |          |
| Self-employed                                  | 30 (40.0)         | 45 (60.0)           |      |       |          |
| Student                                        | 39 (20.1)         | 155 (79.9)          |      |       |          |
| Other                                          | 53 (34.0)         | 103 (66.0)          |      |       |          |
| <b>Income (¥)</b>                              |                   |                     |      |       |          |
| <3000                                          | 114 (22.8)        | 386 (77.2)          |      |       |          |
| 3000-5000                                      | 82 (27.2)         | 220 (72.8)          | 0.71 | 0.607 | to <     |
| 5000-10000                                     | 66 (35.3)         | 121 (64.7)          | 2    | 0.835 | 0.001*   |
| ≥10000                                         | 22 (41.5)         | 31 (68.5)           |      |       |          |
| <b>Indigestion, stomach discomfort or pain</b> |                   |                     |      |       |          |
| Yes                                            | 181 (36.1)        | 320 (63.9)          | 1.74 | 1.279 | to <     |
| No                                             | 103 (19.0)        | 438 (81.0)          | 4    | 2.379 | 0.001*   |
| <b>Related diseases of stomach</b>             |                   |                     |      |       |          |
| Yes                                            | 145 (56.9)        | 110 (43.1)          |      |       |          |
| No                                             | 115 (19.2)        | 485 (80.8)          | 3.32 | 2.578 | to <     |
| Don't know                                     | 24 (12.8)         | 163 (87.2)          | 6    | 4.292 | 0.001*   |
| <b>Knowledge level</b>                         |                   |                     |      |       |          |
| High                                           | 84 (34.4)         | 160 (65.6)          |      |       |          |
| Moderate                                       | 126 (36.2)        | 222 (63.8)          | 0.60 | 0.507 | to <     |
| Low                                            | 74 (16.4)         | 376 (83.6)          | 2    | 0.716 | 0.001*   |

\*Statistically significant at P<0.05.

CI, confidence interval; OR, odds ratio.

### *Health related behaviors of general population*

More than half of the participants' (553,53.1%) fruit intake was less than 200g/day, the ideal intake recommended by the Dietary guidelines for Chinese residents. About 941 (90.3%) participants never used anti-HP toothpaste and 253 (24.3%) participants brushed their teeth once a day. A total of 203 (19.5%) of the participants often eat out and 418 (40.1%) of the participants often eat in groups. About 442 (40.5%) have never used serving spoons and chopsticks. Among the 1042 participants, 460 (44.1%) of the participants have never sterilized their home tableware (Table 6).

Table 7 shows the results of multivariate analysis of factors related to HP infection. The risk factors of HP infection in this study were eating out (OR 0.512, 95% CI 0.322-0.816) and group eating (OR 0.564, 95% CI 0.384-0.827).

**Table 6 Health related behaviors of general population (n=1042)**

| <b>Health related behaviors</b>  | <b>N(%)</b> |
|----------------------------------|-------------|
| Salty diet                       |             |
| Light                            | 502 (48.2)  |
| More salty                       | 513 (49.2)  |
| Very salty                       | 27 (2.6)    |
| Consumption of pickled foods     |             |
| Never                            | 97 (9.3)    |
| Occasionally                     | 848 (81.4)  |
| Usual                            | 97 (9.3)    |
| Consumption of vegetables(daily) |             |
| >500g                            | 108 (10.4)  |
| 300-500g                         | 554 (53.2)  |
| <300g                            | 380 (36.5)  |
| Consumption of fruits(daily)     |             |
| >350g                            | 95 (9.1)    |
| 200-350g                         | 394 (37.8)  |
| <200g                            | 553 (53.1)  |
| Dessert intake (daily)           |             |
| Never                            | 298 (28.6)  |
| Occasionally                     | 686 (65.8)  |
| Usual                            | 58 (5.6)    |
| Use of anti-HP toothpaste        |             |
| Never                            | 941 (90.3)  |

|    |                                                                   |            |
|----|-------------------------------------------------------------------|------------|
| 1  |                                                                   |            |
| 2  |                                                                   |            |
| 3  | Occasionally                                                      | 97 (9.3)   |
| 4  | Usual                                                             | 4 (0.4)    |
| 5  |                                                                   |            |
| 6  | Times of brushing teeth                                           |            |
| 7  | > 3 times/day                                                     | 3 (0.3)    |
| 8  | 3 times/day                                                       | 50 (4.8)   |
| 9  | 2 times/day                                                       | 735 (70.5) |
| 10 | 1 time/day                                                        | 253 (24.3) |
| 11 |                                                                   |            |
| 12 | Drinking unboiled water                                           |            |
| 13 | Never                                                             | 772 (74.1) |
| 14 | Occasionally                                                      | 219 (21.0) |
| 15 | Usual                                                             | 51 (4.9)   |
| 16 |                                                                   |            |
| 17 | Regular diet                                                      |            |
| 18 | Regular                                                           | 549 (52.7) |
| 19 | Suboptimal                                                        | 407 (39.1) |
| 20 | Irregular                                                         | 86 (8.3)   |
| 21 |                                                                   |            |
| 22 | Eating out                                                        |            |
| 23 | Never                                                             | 55 (5.3)   |
| 24 | Occasionally                                                      | 784 (75.2) |
| 25 | Usual                                                             | 203 (19.5) |
| 26 |                                                                   |            |
| 27 | Group dining                                                      |            |
| 28 | Never                                                             | 74 (7.1)   |
| 29 | Occasionally                                                      | 550 (52.8) |
| 30 | Usual                                                             | 418 (40.1) |
| 31 |                                                                   |            |
| 32 | Use of serving spoons and chopsticks                              |            |
| 33 | Never                                                             | 422 (40.5) |
| 34 | Occasionally                                                      | 478 (45.9) |
| 35 | Usual                                                             | 142 (13.6) |
| 36 |                                                                   |            |
| 37 | Tableware disinfection                                            |            |
| 38 | 1 time/day                                                        | 198 (19.0) |
| 39 | 3-5 times/week                                                    | 114 (10.9) |
| 40 | 1-2 times/week                                                    | 270 (25.9) |
| 41 | Never                                                             | 460 (44.1) |
| 42 |                                                                   |            |
| 43 | Habit of washing hands before meals and after going to the toilet |            |
| 44 | Every time                                                        | 736 (70.6) |
| 45 | Usual                                                             | 225 (21.6) |
| 46 | Sometiomes                                                        | 81 (7.8)   |
| 47 |                                                                   |            |
| 48 | Smoking                                                           |            |
| 49 | Never                                                             | 821 (78.8) |
| 50 | Ever                                                              | 81 (7.8)   |
| 51 | At present                                                        | 140 (13.4) |
| 52 |                                                                   |            |
| 53 | Drinking                                                          |            |
| 54 | Never                                                             | 674 (64.7) |
| 55 | Ever                                                              | 276 (26.5) |
| 56 | At present                                                        | 92 (8.8)   |
| 57 |                                                                   |            |
| 58 |                                                                   |            |
| 59 |                                                                   |            |
| 60 |                                                                   |            |

**Table 7 Bivariate analysis of factors associated with *Helicobacter pylori* infection (n=1042)**

| Variable     | <i>Helicobacter pylori</i> infection |            | 95%CI          | P      |
|--------------|--------------------------------------|------------|----------------|--------|
|              | Yes N (%)                            | No N (%)   |                |        |
| Eating out   |                                      |            |                |        |
| Never        | 2 (12.5)                             | 14 (87.5)  |                |        |
| Occasionally | 84 (34.1)                            | 162 (65.9) | 0.322 to 0.816 | 0.005* |
| Usual        | 38 (49.4)                            | 39 (50.6)  |                |        |
| Group dining |                                      |            |                |        |
| Never        | 7 (24.1)                             | 22 (75.9)  |                |        |
| Occasionally | 55 (30.7)                            | 124 (69.3) | 0.384 to 0.827 | 0.003* |
| Usual        | 62 (47.3)                            | 69 (52.7)  |                |        |

\*Statistically significant at P<0.05.

CI, confidence interval; OR, odds ratio.

## Discussion

Understanding the general population's awareness and attitude towards HP screening can help to develop appropriate HP prevention and screening strategies. Overall, the study found that most of the participants had insufficient awareness of HP, and only a small number of them had HP test. However, most of the participants had a positive attitude towards HP screening and its benefits. The main reasons for unwillingness to undertake HP test include no symptoms and lack of knowledge about benefits of the test.

### *Helicobacter pylori* knowledge

The results of this study showed that the knowledge level of HP in the general population was poor, which was similar to the previous studies<sup>15,16,18,19,21</sup>. Wu et al<sup>15</sup> showed that 35% of the participants correctly answered the harmfulness of the HP infection. Shin et al<sup>19</sup> reported that 37.2% of the participants believed that HP would not cause symptoms of dyspepsia and most people did not know the treatment of HP. Another study<sup>16</sup> reported that only 27% of participants correctly answered that HP was associated with peptic ulcer. And stress was considered to be the biggest risk factor for

1  
2  
3  
4 gastric cancer rather than HP<sup>18</sup>. In general, the participants had a good awareness of the  
5 mode of transmission and prevention of HP, but they had a poor understanding of the  
6 harm, therapeutic benefits, treatment, testing, and the timing of screening and treatment  
7 of HP infection. This result indicates that health education should focus on these aspects.  
8  
9 The results of this study also showed that 68.9% of participants reported hearing of  
10 H.pylori, which is higher than previous studies<sup>17,21</sup>. The reason may lie in that the  
11 effect of eradicating HP has been explored in some areas with high incidence of gastric  
12 cancer in China and the publicity of information related to gastric cancer and HP has  
13 increased. With the exposure to the media and use of mobile phones, the general  
14 population may have some understanding of HP<sup>15,26</sup>.

23 The general population's awareness of HP was related to their socio-demographic  
24 characteristics. Our study found that men, the elderly, under-educated participants and  
25 those who had never undertaken HP test had lower awareness. In addition, participants  
26 who used to eat out and use serving spoons and chopsticks, and medical staff and  
27 students, showed better awareness. In daily life, women are more likely to assume the  
28 role of family caregivers than men, participate in nursing services, pay attention to  
29 health knowledge, and gain more knowledge about HP in this process<sup>27,28</sup>. The reason  
30 for the higher awareness level of medical staff, students and people with higher  
31 education level may be that they have more access to all kinds of health education  
32 knowledge<sup>29</sup>, and medical staff have more professional knowledge. In fact, HP  
33 infection rate is closely related to socio-economic status<sup>30</sup>, so health education  
34 intervention should pay more attention to socially disadvantaged individuals. Besides,  
35 after the HP test or treatment, people with or without HP infection would gain more  
36 understanding of HP compared with those who have never undertake HP test<sup>15,31</sup>. The  
37 results of this study show that people who often eat out and use serving spoons and  
38 chopsticks have a higher level of knowledge, but the proportion of these people is less  
39 than 20%. The possible reason for this result is that the media has a certain exposure to  
40 HP and promoting the use of serving spoons and chopsticks, but it has not widely  
41 aroused people's attention to the prevention of HP infection<sup>15,32,33</sup>. Therefore,  
42 educational education also needs to increase the radiation of media publicity, so that  
43  
44  
45  
46  
47  
48  
49  
50  
51  
52  
53  
54  
55  
56  
57  
58  
59  
60

1  
2  
3  
4 the general population can acquire more relevant health knowledge in their daily life.  
5  
6

#### 7 *Helicobacter pylori* screening attitude

8  
9 In this study, most of the participants had a positive attitude towards HP detection, but  
10 only 27.3% of the participants had undertaken HP test, which was consistent with the  
11 results of previous studies<sup>15,19</sup>. WU et al<sup>15</sup> reported that 87% of participants supported  
12 HP screening, but the screening rate was only 21.7%. Shin et al<sup>19</sup> reported that most  
13 participants were willing to accept the HP "detection and treatment" strategy to prevent  
14 gastric cancer, but only 36.6% of them said they had undertaken HP test. In an early  
15 study in China<sup>21</sup>, 81% of the participants thought they would not be infected with HP,  
16 but the actual infection rate of HP was 41%. This attitude may be affected by the fact  
17 that HP's turning to the gastric cancer involves a multi-step process from chronic  
18 gastritis to atrophic gastritis, intestinal metaplasia, atypical hyperplasia and gastric  
19 cancer, which may take decades<sup>34</sup>. During this process, HP infection is asymptomatic  
20 or take many years to appear symptoms<sup>15</sup>.  
21  
22  
23  
24  
25  
26  
27  
28  
29  
30  
31  
32

33 In this study, the primary reason for participants' reluctance to undertake HP test  
34 was no symptoms, which was not mentioned in previous study about HP testing. This  
35 was similar to the results of gastroscopic screening for gastric cancer in South Korea<sup>18</sup>.  
36 This may be related to engraved Chinese cultural beliefs that it is unnecessary to seek  
37 medical care when no obvious symptoms are observed<sup>32,35</sup>. The results showed that  
38 most of the participants said that doctors had not discussed HP test with them. The  
39 reason may due to the poor health resources and heavy workload of doctors who had  
40 an average 5-hour workload of 34.3 patients<sup>12,36</sup>. When seeing a doctor, the doctor  
41 prescribe a test or treatment because he may not have time to carefully discuss with  
42 patients about the potential benefits or dangers of eradicating HP. And the general  
43 population has a poor knowledge of HP, so even if the participants have a positive  
44 attitude towards screening, HP test is still in a state of passive acceptance, that is,  
45 opportunistic screening, rather than active requirements. Therefore, it should be  
46 advocated to reduce the workload of doctors and train new doctors, give full play to the  
47 role of medical workers in health education, influence people's views on diseases, and  
48  
49  
50  
51  
52  
53  
54  
55  
56  
57  
58  
59  
60



1  
2  
3  
4 advocate regular screening.

5  
6 The results of multivariate analysis showed that occupation, monthly income,  
7 stomach discomfort symptoms, stomach-related diseases and knowledge scores will  
8 affect HP detection behaviors. People with low monthly income were less likely  
9 undertook HP test than those with high monthly income. Interestingly, HP infection is  
10 closely related to social economy<sup>30</sup>, while lack of money and high cost are common  
11 barriers to preventive screening<sup>32</sup>. It also may be the reason why the detection rate of  
12 students, workers and farmers is lower than that of other occupations in this study. And  
13 farmers and workers may have insufficient access to social resources about HP  
14 screening information<sup>37</sup>. In contrast to no symptoms, people will seek medical care  
15 when they have symptoms of stomach discomfort or stomach-related diseases<sup>38</sup>.  
16 Participants with low knowledge scores were less likely to undertake test of HP because  
17 of a lack of awareness of the risk of the disease, and Wu's study pointed out that the  
18 level of awareness of HP affected the rate of HP screening<sup>15</sup>. To improve HP screening  
19 rate, the HP knowledge level of the general population should be improved and targeted  
20 intervention should be carried out. Furthermore, health education should pay more  
21 attention to those who are under-served and socially disadvantaged.  
22  
23  
24  
25  
26  
27  
28  
29  
30  
31  
32  
33  
34  
35  
36  
37  
38

### 39 *Helicobacter pylori* infection and health-related behaviors

40 Some known risk factors and transmission routes of HP infection are associated with  
41 health-related behaviors<sup>2</sup>. More than half of the participants in this study had a daily  
42 fruit intake of less than 200g. A study from Latvia<sup>39</sup> reported that HP infection was  
43 associated with lifestyle, especially dietary factors. Participants' vegetables or fruits  
44 daily intake of more than 400g was negatively correlated with HP infection. Wang et  
45 al<sup>40</sup> also reported that eating fruits and vegetables can reduce the risk of stomach cancer  
46 caused by HP. This suggests that medical professional should encourage people to  
47 adjust their diet and eat more fruits and vegetables. The results of this study also showed  
48 that 24.3% of the participants only brushed their teeth once a day, and 90.3% of the  
49 participants had never used anti-HP toothpaste. A study from Brazil has shown that the  
50 oral cavity is likely to be the parasitic environment of HP<sup>41</sup>. An intervention study from  
51  
52  
53  
54  
55  
56  
57  
58  
59  
60

1  
2  
3  
4 China<sup>42</sup> showed that the oral HP negative transformation rate was 31.03% (27/87) when  
5 special toothpaste was used to brush teeth twice a day in the morning and evening.  
6  
7 Therefore, medical workers should emphasize the importance of eradicating HP from  
8 oral microenvironment and maintaining oral hygiene in public.  
9

10  
11 The multivariate results of this study showed the risk factors of HP infection are  
12 dining out and group meals, which was similar to the results of previous studies<sup>42,43</sup>.  
13  
14 Studies by Rosa Monno et.al showed that eating food from street vendors and eating  
15 out were associated with HP infection and may be related to poor hygiene<sup>43</sup>. Xu et al<sup>42</sup>  
16 reported that poor hygiene habits such as not using serving spoons and chopsticks and  
17 eating together increase the risk of HP infection. In China, the habit of not using serving  
18 spoons and chopsticks and eating together may play a very important role in HP  
19 infection and reinfection. In fact, a retrospective study<sup>44</sup> in Hong Kong reported that  
20 the prevalence of HP in children declined between 2005 and 2017, which may be due  
21 to the habit of using serving spoons and chopsticks and a decline in adult infection rates,  
22 leading to a decrease in HP transmission among family members. Thus, medical  
23 workers should further strengthen the publicity and education of health knowledge, and  
24 advocate the individual serving and serving spoons and chopsticks.  
25  
26  
27  
28  
29  
30  
31  
32  
33  
34  
35  
36  
37  
38

### 39 *Taking one step forward*

40 In Japan, gastric cancer screening was incorporated into the national plan long time  
41 ago. In 2000, health insurance supported HP eradication in patients with peptic ulcer.  
42  
43 In 2013, HP eradication treatment in patients with HP positive chronic gastritis  
44 diagnosed by endoscopy was included in the national health insurance<sup>45,46</sup>. The organic  
45 combination of primary prevention of HP screening and eradication therapy with  
46 secondary prevention of gastric cancer screening became a mature policy for gastric  
47 cancer prevention and control in recent years, and the implementation of these medical  
48 insurance policies has also achieved good results<sup>47,48</sup>. In China, the government has  
49 paid attention to public awareness of cancer, implemented the Three-year Action Plan  
50 for Cancer Prevention and Control in China (2015-2017), and explored HP eradication  
51 treatment in some areas with high incidence of gastric cancer, which is highly cost-  
52  
53  
54  
55  
56  
57  
58  
59  
60

1  
2  
3  
4 effective<sup>26</sup>. However, there is a lack of evidence to assess the effectiveness of these  
5  
6 measures. Therefore, this study can be used as a basis for measuring the effectiveness  
7  
8 of further health interventions.

9  
10 This study shows that there is a lack of awareness of HP among the general  
11  
12 population, and there are some misunderstandings and obstacles in HP screening and  
13  
14 prevention. Therefore, some suggestions are offered to improve the general population's  
15  
16 awareness of HP. Firstly, in the prevention and control of gastric cancer, the  
17  
18 government can consider combining primary prevention with secondary prevention and  
19  
20 adding it into health insurance<sup>47</sup>. Secondly, media should be properly leveraged to  
21  
22 publicize the information related to popular science HP<sup>32</sup>. Thirdly, community hospitals  
23  
24 should strengthen health education for community people, give full play to the role of  
25  
26 community medical workers, and improve people's awareness of HP. In health  
27  
28 education, the little-known risk factors and screening obstacles found in this study  
29  
30 should be emphasized. In addition, health education activities should pay more  
31  
32 attention to those with low income and poor knowledge. Fourthly, medical workers  
33  
34 should strengthen the education of HP prevention knowledge and encourage people to  
35  
36 develop good health-related habits, such as adjusting eating habits, using serving  
37  
38 spoons and chopsticks.

#### 39 40 41 *Strengths and limitations*

42  
43 This study investigated the awareness and screening attitude of HP, and health-related  
44  
45 behaviors among the general population. In the course of the survey, a high response  
46  
47 rate was achieved through face-to-face interviews. Moreover, there are some limitations.  
48  
49 First, as the participants' information was self-reported, there may be recall bias.  
50  
51 Secondly, the answers to some questions may be subjective. For example, the  
52  
53 demarcation of "light", "salty" and "very salty" was not clear, but it could be evaluated  
54  
55 by daily salt intake. Thirdly, regarding the screening of behavioral barriers, only  
56  
57 quantitative research method is adopted, so the research findings require further  
58  
59 confirmation and support. Hence, further study could be carried out using qualitative or  
60

1  
2  
3  
4 mixed methods.  
5  
6

## 7 **Conclusions**

9 This study shows that general population's knowledge about *Helicobacter pylori* is poor,  
10 and only a small number of people have undertaken HP test. However, a majority of  
11 people have a positive attitude towards HP screening. The main reasons for reluctance  
12 to take a test are that being asymptomatic and lack of knowledge about benefits of the  
13 test. Relevant health education and intervention measures should be carried out to  
14 improve the awareness and screening rate of *Helicobacter pylori* and to advocate a  
15 healthy lifestyle in the general population in China.  
16  
17  
18  
19  
20  
21  
22  
23  
24

## 25 **Conflict of interest**

26 The authors declare that they have no competing interests.  
27  
28

## 29 **Acknowledgement**

30 The authors thank all the participants in this study. We are grateful to Professor Shui-  
31 dong Feng on statistical consultation. We also gratefully acknowledge Professor De-  
32 liang Cao and Professor Qian Tao (The Chinese University of Hong Kong) for their  
33 advice with manuscript writing.  
34  
35  
36  
37  
38

## 39 **Contributions**

40 Conceptualization, Ying Zeng, Xi Zeng, Ying-xin Wang and Jin-yu Zou; Data curation,  
41 Ying Zeng, Xi Zeng, Ying-xin Wang, Jin-yu Zou, Li-feng Hu; Investigation, Ying-xin  
42 Wang, Jin-yu Zou, Li-feng Hu, Qi Liu, Ruo-lin Huang, Tian Tang, Qian-qian Yue,  
43 Ying-xue Sun, Qiao Xiao; Methodology, Ying Zeng, Xi Zeng; Software, Qi Liu;  
44 Writing original draft, Ying Zeng, Ying-xin Wang, Jin-yu Zou; Writing review &  
45 editing, Ying Zeng, Xi Zeng.  
46  
47  
48  
49  
50

## 51 **Funding**

52 This study was funded by the National Natural Science Foundation of China (NSFC),  
53 Grant/Award number: 81641112; Hunan Provincial Natural Science Foundation of  
54 China, Grant/Award number: 2019JJ50521, 2019JJ40254; Key Project of Hunan  
55 Provincial Education Department, Grant/Award number: 18A229; Hunan Excellent  
56  
57  
58  
59  
60

1  
2  
3 Young Teachers Fund, Grant/Award number: 2018191RQG010; Excellent Youth  
4 Project of Hunan Provincial Department of Education, Grant/Award number: 19B495;  
5 University of South China Innovation Foundation for Postgraduate, Grant/Award:  
6 2021101; The University of South China Innovation & Entrepreneurship Foundation  
7 for Undergraduate, Grant/Award: 20212544 . This work was also supported by the  
8 construction program of the key discipline in Hunan Province, Center for Gastric  
9 Cancer Research of Hunan Province and Key Laboratory of Tumour Cellular &  
10 Molecular Pathology ( Hengyang Medical School, University of South China): N/A.  
11  
12  
13  
14  
15  
16  
17  
18  
19

## 20 References

- 21 1. Hooi JKY, Lai WY, Ng WK, et al. Global Prevalence of Helicobacter pylori  
22 Infection: Systematic Review and Meta-Analysis. *Gastroenterology*.  
23 2017;153(2):420-429.
- 24 2. Leja M, Grinberga-Derica I, Bilgiler C, Steininger C. Review: Epidemiology  
25 of Helicobacter pylori infection. *Helicobacter*. 2019;24 Suppl 1:e12635.
- 26 3. Zamani M, Ebrahimitabar F, Zamani V, et al. Systematic review with meta-  
27 analysis: the worldwide prevalence of Helicobacter pylori infection. *Alimentary*  
28 *Pharmacology & Therapeutics*. 2018;47(7):868-876.
- 29 4. Bray F, Ferlay J, Soerjomataram I, Siegel RL, Torre LA, Jemal A. Global cancer  
30 statistics 2018: GLOBOCAN estimates of incidence and mortality worldwide  
31 for 36 cancers in 185 countries. *CA: a cancer journal for clinicians*.  
32 2018;68(6):394-424.
- 33 5. Wang FH, Shen L, Li J, et al. The Chinese Society of Clinical Oncology  
34 (CSCO): clinical guidelines for the diagnosis and treatment of gastric cancer.  
35 *Cancer communications (London, England)*. 2019;39(1):10.
- 36 6. Kentaro S, Jan T, J KE, et al. Kyoto global consensus report on Helicobacter  
37 pylori gastritis. *Gut*. 2015;64(9).
- 38 7. den Hoed CM, Kuipers EJ. Gastric Cancer: How Can We Reduce the Incidence  
39 of this Disease? *Current gastroenterology reports*. 2016;18(7):34.
- 40 8. Lee YC, Chiang TH, Chou CK, et al. Association Between Helicobacter pylori  
41 Eradication and Gastric Cancer Incidence: A Systematic Review and Meta-  
42 analysis. *Gastroenterology*. 2016;150(5):1113-1124.e1115.
- 43 9. Zong L, Abe M, Seto Y, Ji J. The challenge of screening for early gastric cancer  
44 in China. *Lancet (London, England)*. 2016;388(10060):2606.
- 45 10. Liu WZ, Xie Y, Lu H, et al. Fifth Chinese National Consensus Report on the  
46 management of Helicobacter pylori infection. *Helicobacter*. 2018;23(2):e12475.
- 47 11. McColl KE. Clinical practice. Helicobacter pylori infection. *The New England*  
48 *journal of medicine*. 2010;362(17):1597-1604.
- 49 12. Nie Y, Wu K, Yu J, et al. A global burden of gastric cancer: the major impact  
50 of China. *Expert review of gastroenterology & hepatology*. 2017;11(7):651-661.  
51  
52  
53  
54  
55  
56  
57  
58  
59  
60

13. Shen L, Zhou C, Liu L, et al. Application of oral contrast trans-abdominal ultrasonography for initial screening of gastric cancer in rural areas of China. *Digestive and liver disease : official journal of the Italian Society of Gastroenterology and the Italian Association for the Study of the Liver*. 2017;49(8):918-923.
14. Tao W, Wang HX, Guo YF, Yang L, Li P. Establish a Scoring Model for High-Risk Population of Gastric Cancer and Study on the Pattern of Opportunistic Screening. *Gastroenterol Res Pract*. 2020;2020:5609623.
15. Wu Y, Su T, Zhou X, Lu N, Li Z, Du Y. Awareness and attitudes regarding Helicobacter pylori infection in Chinese physicians and public population: A national cross-sectional survey. *Helicobacter*. 2020;25(4):e12705.
16. Knowledge about causes of peptic ulcer disease -- United States, March-April 1997. *MMWR Morbidity and mortality weekly report*. 1997;46(42):985-987.
17. Chen SY, Liu TS, Fan XM, et al. [Epidemiological study of Helicobacter pylori infection and its risk factors in Shanghai]. *Zhonghua yi xue za zhi*. 2005;85(12):802-806.
18. Oh D-Y, Choi KS, Shin H-R, Bang Y-J. Public Awareness of Gastric Cancer Risk Factors and Disease Screening in a High Risk Region: A Population-Based Study. *Cancer Research and Treatment*. 2009;41(2).
19. Shin DW, Cho J, Kim SH, et al. Preferences for the "screen and treat" Strategy of Helicobacter pylori to Prevent Gastric Cancer in Healthy Korean Populations. *Helicobacter*. 2013;18(4):262-269.
20. Wynne A, Hastings EV, Colquhoun A, Chang H-J, Goodman KJ, Grp CAW. Untreated water and Helicobacter pylori: perceptions and behaviors in a Northern Canadian community. *International Journal of Circumpolar Health*. 2013;72:704-705.
21. Xia P, Ma MF, Wang W. Status of Helicobacter pylori infection among migrant workers in Shijiazhuang, China. *Asian Pacific journal of cancer prevention : APJCP*. 2012;13(4):1167-1170.
22. Sharma VK, Bailey DM, Raufman JP, et al. A survey of internal medicine residents' knowledge about Helicobacter pylori infection. *The American journal of gastroenterology*. 2000;95(8):1914-1919.
23. Liu Q, Zeng X, Wang W, et al. Awareness of risk factors and warning symptoms and attitude towards gastric cancer screening among the general public in China: a cross-sectional study. *BMJ open*. 2019;9(7):e029638.
24. Hajian-Tilaki K. Sample size estimation in epidemiologic studies. *Caspian J Intern Med*. 2011;2(4):289-298.
25. Taha H, Al Jaghbeer M, Al-Sabbagh MQ, Al Omari L, Berggren V. Knowledge and Practices of Colorectal Cancer Early Detection Examinations in Jordan: A Cross Sectional Study. *Asian Pacific journal of cancer prevention : APJCP*. 2019;20(3):831-838.
26. Li WQ, Zhang JY, Ma JL, et al. Effects of Helicobacter pylori treatment and vitamin and garlic supplementation on gastric cancer incidence and mortality: follow-up of a randomized intervention trial. *BMJ (Clinical research ed)*.

- 2019;366:l5016.
27. Qin L, Xu H. A cross-sectional study of the effect of health literacy on diabetes prevention and control among elderly individuals with prediabetes in rural China. *BMJ open*. 2016;6(5):e011077.
  28. Sara, Arber, BSc, et al. Gender differences in informal caring. *Health & Social Care in the Community*. 2007;3(1):19-31.
  29. Huang RL, Liu Q, Wang YX, et al. Awareness, attitude and barriers of colorectal cancer screening among high-risk populations in China: a cross-sectional study. *BMJ open*. 2021;11(7):e045168.
  30. Inoue M. Changing epidemiology of Helicobacter pylori in Japan. *Gastric cancer : official journal of the International Gastric Cancer Association and the Japanese Gastric Cancer Association*. 2017;20(Suppl 1):3-7.
  31. Emmons KM, Colditz GA. Realizing the Potential of Cancer Prevention - The Role of Implementation Science. *The New England journal of medicine*. 2017;376(10):986-990.
  32. Sin MK, Kim IH. Facilitators of and Barriers to Gastric Cancer Screening Among Korean Americans. *Cancer nursing*. 2017;40(4):E59-e65.
  33. Hung LS. The SARS epidemic in Hong Kong: what lessons have we learned? *Journal of the Royal Society of Medicine*. 2003;96(8):374-378.
  34. Driscoll LJ, Brown HE, Harris RB, Oren E. Population Knowledge, Attitude, and Practice Regarding Helicobacter pylori Transmission and Outcomes: A Literature Review. *Frontiers in Public Health*. 2017;5.
  35. Jung MY, Holt CL, Ng D, et al. The Chinese and Korean American immigrant experience: a mixed-methods examination of facilitators and barriers of colorectal cancer screening. *Ethnicity & health*. 2018;23(8):847-866.
  36. Guan X, Ni B, Zhang J, et al. Association Between Physicians' Workload and Prescribing Quality in One Tertiary Hospital in China. *Journal of patient safety*. 2020.
  37. White A, Thompson TD, White MC, et al. Cancer Screening Test Use - United States, 2015. *MMWR Morbidity and mortality weekly report*. 2017;66(8):201-206.
  38. Sin MK, Ha A, Taylor V. Sociocultural Barriers to Lung Cancer Screening Among Korean Immigrant Men. *Journal of community health*. 2016;41(4):790-797.
  39. Razuka-Ebela D, Polaka I, Parshutin S, et al. Sociodemographic, Lifestyle and Medical Factors Associated with Helicobacter Pylori Infection. *Journal of gastrointestinal and liver diseases : JGLD*. 2020;29(3):319-327.
  40. Wang T, Cai H, Sasazuki S, et al. Fruit and vegetable consumption, Helicobacter pylori antibodies, and gastric cancer risk: A pooled analysis of prospective studies in China, Japan, and Korea. *International journal of cancer*. 2017;140(3):591-599.
  41. Gebara EC, Faria CM, Pannuti C, Chehter L, Mayer MP, Lima LA. Persistence of Helicobacter pylori in the oral cavity after systemic eradication therapy. *Journal of clinical periodontology*. 2006;33(5):329-333.

- 1  
2  
3  
4  
5  
6  
7  
8  
9  
10  
11  
12  
13  
14  
15  
16  
17  
18  
19  
20  
21  
22  
23  
24  
25  
26  
27  
28  
29  
30  
31  
32  
33  
34  
35  
36  
37  
38  
39  
40  
41  
42  
43  
44  
45  
46  
47  
48  
49  
50  
51  
52  
53  
54  
55  
56  
57  
58  
59  
60
42. Xu YE, Li SX, Gao X, Wang XP. [Risk factors of oral *Helicobacter pylori* infection among children in two kindergartens in Suzhou and the effects of oral cleaning on reducing oral *Helicobacter pylori* infection]. *Hua xi kou qiang yi xue za zhi = Huaxi kouqiang yixue zazhi = West China journal of stomatology*. 2019;37(1):70-75.
  43. Monno R, De Laurentiis V, Trerotoli P, Roselli AM, Ierardi E, Portincasa P. *Helicobacter pylori* infection: association with dietary habits and socioeconomic conditions. *Clinics and research in hepatology and gastroenterology*. 2019;43(5):603-607.
  44. Tang MYL, Chung PHY, Chan HY, Tam PKH, Wong KK. Recent trends in the prevalence of *Helicobacter Pylori* in symptomatic children: A 12-year retrospective study in a tertiary centre. *Journal of pediatric surgery*. 2019;54(2):255-257.
  45. Asaka M, Kato M, Takahashi S, et al. Guidelines for the management of *Helicobacter pylori* infection in Japan: 2009 revised edition. *Helicobacter*. 2010;15(1):1-20.
  46. Asaka M, Mabe K, Matsushima R, Tsuda M. *Helicobacter pylori* Eradication to Eliminate Gastric Cancer: The Japanese Strategy. *Gastroenterology clinics of North America*. 2015;44(3):639-648.
  47. Hiroi S, Sugano K, Tanaka S, Kawakami K. Impact of health insurance coverage for *Helicobacter pylori* gastritis on the trends in eradication therapy in Japan: retrospective observational study and simulation study based on real-world data. *BMJ open*. 2017;7(7):e015855.
  48. Sugano K. Strategies for Prevention of Gastric Cancer: Progress from Mass Eradication Trials. *Digestive diseases (Basel, Switzerland)*. 2016;34(5):500-504.



STROBE Statement—Checklist of items that should be included in reports of *cross-sectional studies*

|                              | Item No | Recommendation                                                                                                                                                                                    | Page No |
|------------------------------|---------|---------------------------------------------------------------------------------------------------------------------------------------------------------------------------------------------------|---------|
| <b>Title and abstract</b>    | 1       | (a) Indicate the study's design with a commonly used term in the title or the abstract                                                                                                            | 3       |
|                              |         | (b) Provide in the abstract an informative and balanced summary of what was done and what was found                                                                                               | 3       |
| <b>Introduction</b>          |         |                                                                                                                                                                                                   |         |
| Background/rationale         | 2       | Explain the scientific background and rationale for the investigation being reported                                                                                                              | 4-5     |
| Objectives                   | 3       | State specific objectives, including any prespecified hypotheses                                                                                                                                  | 5       |
| <b>Methods</b>               |         |                                                                                                                                                                                                   |         |
| Study design                 | 4       | Present key elements of study design early in the paper                                                                                                                                           | 5       |
| Setting                      | 5       | Describe the setting, locations, and relevant dates, including periods of recruitment, exposure, follow-up, and data collection                                                                   | 5-6     |
| Participants                 | 6       | (a) Give the eligibility criteria, and the sources and methods of selection of participants                                                                                                       | 5-7     |
| Variables                    | 7       | Clearly define all outcomes, exposures, predictors, potential confounders, and effect modifiers. Give diagnostic criteria, if applicable                                                          | 6-7     |
| Data sources/<br>measurement | 8*      | For each variable of interest, give sources of data and details of methods of assessment (measurement). Describe comparability of assessment methods if there is more than one group              | 6-7     |
| Bias                         | 9       | Describe any efforts to address potential sources of bias                                                                                                                                         | 6-7     |
| Study size                   | 10      | Explain how the study size was arrived at                                                                                                                                                         | 5       |
| Quantitative variables       | 11      | Explain how quantitative variables were handled in the analyses. If applicable, describe which groupings were chosen and why                                                                      | 7       |
| Statistical methods          | 12      | (a) Describe all statistical methods, including those used to control for confounding                                                                                                             | 7       |
|                              |         | (b) Describe any methods used to examine subgroups and interactions                                                                                                                               |         |
|                              |         | (c) Explain how missing data were addressed                                                                                                                                                       | 8       |
|                              |         | (d) If applicable, describe analytical methods taking account of sampling strategy                                                                                                                |         |
|                              |         | (e) Describe any sensitivity analyses                                                                                                                                                             | 7       |
| <b>Results</b>               |         |                                                                                                                                                                                                   |         |
| Participants                 | 13*     | (a) Report numbers of individuals at each stage of study—eg numbers potentially eligible, examined for eligibility, confirmed eligible, included in the study, completing follow-up, and analysed | 8       |
|                              |         | (b) Give reasons for non-participation at each stage                                                                                                                                              |         |
|                              |         | (c) Consider use of a flow diagram                                                                                                                                                                |         |
| Descriptive data             | 14*     | (a) Give characteristics of study participants (eg demographic, clinical, social) and information on exposures and potential confounders                                                          | 8-10    |
|                              |         | (b) Indicate number of participants with missing data for each variable of interest                                                                                                               |         |
| Outcome data                 | 15*     | Report numbers of outcome events or summary measures                                                                                                                                              | 10-19   |

|    |                          |    |                                                                                                                                                                                                              |
|----|--------------------------|----|--------------------------------------------------------------------------------------------------------------------------------------------------------------------------------------------------------------|
| 1  |                          |    |                                                                                                                                                                                                              |
| 2  | Main results             | 16 | (a) Give unadjusted estimates and, if applicable, confounder-adjusted estimates and their precision (eg, 95% confidence interval). Make clear which confounders were adjusted for and why they were included |
| 3  |                          |    |                                                                                                                                                                                                              |
| 4  |                          |    |                                                                                                                                                                                                              |
| 5  |                          |    |                                                                                                                                                                                                              |
| 6  |                          |    | (b) Report category boundaries when continuous variables were categorized                                                                                                                                    |
| 7  |                          |    |                                                                                                                                                                                                              |
| 8  |                          |    | (c) If relevant, consider translating estimates of relative risk into absolute risk for a meaningful time period                                                                                             |
| 9  |                          |    |                                                                                                                                                                                                              |
| 10 |                          |    |                                                                                                                                                                                                              |
| 11 | Other analyses           | 17 | Report other analyses done—eg analyses of subgroups and interactions, and sensitivity analyses                                                                                                               |
| 12 |                          |    |                                                                                                                                                                                                              |
| 13 |                          |    |                                                                                                                                                                                                              |
| 14 | <b>Discussion</b>        |    |                                                                                                                                                                                                              |
| 15 | Key results              | 18 | Summarise key results with reference to study objectives                                                                                                                                                     |
| 16 | Limitations              | 19 | Discuss limitations of the study, taking into account sources of potential bias or imprecision. Discuss both direction and magnitude of any potential bias                                                   |
| 17 |                          |    |                                                                                                                                                                                                              |
| 18 |                          |    |                                                                                                                                                                                                              |
| 19 |                          |    |                                                                                                                                                                                                              |
| 20 | Interpretation           | 20 | Give a cautious overall interpretation of results considering objectives, limitations, multiplicity of analyses, results from similar studies, and other relevant evidence                                   |
| 21 |                          |    |                                                                                                                                                                                                              |
| 22 |                          |    |                                                                                                                                                                                                              |
| 23 |                          |    |                                                                                                                                                                                                              |
| 24 | Generalisability         | 21 | Discuss the generalisability (external validity) of the study results                                                                                                                                        |
| 25 |                          |    |                                                                                                                                                                                                              |
| 26 |                          |    |                                                                                                                                                                                                              |
| 27 | <b>Other information</b> |    |                                                                                                                                                                                                              |
| 28 | Funding                  | 22 | Give the source of funding and the role of the funders for the present study and, if applicable, for the original study on which the present article is based                                                |
| 29 |                          |    |                                                                                                                                                                                                              |
| 30 |                          |    |                                                                                                                                                                                                              |
| 31 |                          |    |                                                                                                                                                                                                              |
| 32 |                          |    |                                                                                                                                                                                                              |
| 33 |                          |    |                                                                                                                                                                                                              |
| 34 |                          |    |                                                                                                                                                                                                              |
| 35 |                          |    |                                                                                                                                                                                                              |
| 36 |                          |    |                                                                                                                                                                                                              |
| 37 |                          |    |                                                                                                                                                                                                              |
| 38 |                          |    |                                                                                                                                                                                                              |
| 39 |                          |    |                                                                                                                                                                                                              |
| 40 |                          |    |                                                                                                                                                                                                              |
| 41 |                          |    |                                                                                                                                                                                                              |
| 42 |                          |    |                                                                                                                                                                                                              |
| 43 |                          |    |                                                                                                                                                                                                              |
| 44 |                          |    |                                                                                                                                                                                                              |
| 45 |                          |    |                                                                                                                                                                                                              |
| 46 |                          |    |                                                                                                                                                                                                              |
| 47 |                          |    |                                                                                                                                                                                                              |
| 48 |                          |    |                                                                                                                                                                                                              |
| 49 |                          |    |                                                                                                                                                                                                              |
| 50 |                          |    |                                                                                                                                                                                                              |
| 51 |                          |    |                                                                                                                                                                                                              |
| 52 |                          |    |                                                                                                                                                                                                              |
| 53 |                          |    |                                                                                                                                                                                                              |
| 54 |                          |    |                                                                                                                                                                                                              |
| 55 |                          |    |                                                                                                                                                                                                              |
| 56 |                          |    |                                                                                                                                                                                                              |
| 57 |                          |    |                                                                                                                                                                                                              |
| 58 |                          |    |                                                                                                                                                                                                              |
| 59 |                          |    |                                                                                                                                                                                                              |
| 60 |                          |    |                                                                                                                                                                                                              |

\*Give information separately for exposed and unexposed groups.

**Note:** An Explanation and Elaboration article discusses each checklist item and gives methodological background and published examples of transparent reporting. The STROBE checklist is best used in conjunction with this article (freely available on the Web sites of PLoS Medicine at <http://www.plosmedicine.org/>, Annals of Internal Medicine at <http://www.annals.org/>, and Epidemiology at <http://www.epidem.com/>). Information on the STROBE Initiative is available at [www.strobe-statement.org](http://www.strobe-statement.org).

# BMJ Open

## What is the general Chinese public's awareness of and attitudes towards *Helicobacter pylori* screening and associated health behaviours? A cross-sectional study

|                                 |                                                                                                                                                                                                                                                                                                                                                                                                                                                                                                                                                                                                                                                                                                                                                                                                                                                                                                                                                                                                                                                                                                                                                                                                                                                                                                                                                                                                                                                                                |
|---------------------------------|--------------------------------------------------------------------------------------------------------------------------------------------------------------------------------------------------------------------------------------------------------------------------------------------------------------------------------------------------------------------------------------------------------------------------------------------------------------------------------------------------------------------------------------------------------------------------------------------------------------------------------------------------------------------------------------------------------------------------------------------------------------------------------------------------------------------------------------------------------------------------------------------------------------------------------------------------------------------------------------------------------------------------------------------------------------------------------------------------------------------------------------------------------------------------------------------------------------------------------------------------------------------------------------------------------------------------------------------------------------------------------------------------------------------------------------------------------------------------------|
| Journal:                        | <i>BMJ Open</i>                                                                                                                                                                                                                                                                                                                                                                                                                                                                                                                                                                                                                                                                                                                                                                                                                                                                                                                                                                                                                                                                                                                                                                                                                                                                                                                                                                                                                                                                |
| Manuscript ID                   | bmjopen-2021-057929.R1                                                                                                                                                                                                                                                                                                                                                                                                                                                                                                                                                                                                                                                                                                                                                                                                                                                                                                                                                                                                                                                                                                                                                                                                                                                                                                                                                                                                                                                         |
| Article Type:                   | Original research                                                                                                                                                                                                                                                                                                                                                                                                                                                                                                                                                                                                                                                                                                                                                                                                                                                                                                                                                                                                                                                                                                                                                                                                                                                                                                                                                                                                                                                              |
| Date Submitted by the Author:   | 29-Dec-2021                                                                                                                                                                                                                                                                                                                                                                                                                                                                                                                                                                                                                                                                                                                                                                                                                                                                                                                                                                                                                                                                                                                                                                                                                                                                                                                                                                                                                                                                    |
| Complete List of Authors:       | <p>Wang, Ying-xin ; University of South China, Hengyang Medical School, School of Nursing</p> <p>Zou, Jin-yu; University of South China, Hengyang Medical School, School of Nursing</p> <p>Hu, Li-feng; University of South China, Hengyang Medical School, School of Nursing</p> <p>Liu, Qi; University of South China, Hengyang Medical School, School of Nursing; The Hong Kong Polytechnic University, School of Nursing</p> <p>Huang, Ruo-lin ; University of South China, Hengyang Medical School, School of Nursing</p> <p>Tang, Tian; University of South China, Hengyang Medical School, School of Nursing</p> <p>Yue, Qian-qian; University of South China, Hengyang Medical School, School of Nursing</p> <p>Sun, Ying-xue; University of South China, Hengyang Medical School, School of Nursing</p> <p>Xiao, Qiao; University of South China, Hengyang Medical School, School of Nursing</p> <p>Zeng, Xi ; University of South China, Hengyang Medical School, Hunan Province Key Laboratory of Tumor Cellular &amp; Molecular Pathology, Cancer Research Institute; University of South China, Hengyang Medical School, Hunan Province Cooperative innovation Center for Molecular Target New Drug Study</p> <p>Zeng, Ying ; University of South China, Hengyang Medical School, School of Nursing; University of South China, Hengyang Medical School, Hunan Province Key Laboratory of Tumor Cellular &amp; Molecular Pathology, Cancer Research Institute</p> |
| <b>Primary Subject Heading</b>: | Public health                                                                                                                                                                                                                                                                                                                                                                                                                                                                                                                                                                                                                                                                                                                                                                                                                                                                                                                                                                                                                                                                                                                                                                                                                                                                                                                                                                                                                                                                  |
| Secondary Subject Heading:      | Public health, Infectious diseases                                                                                                                                                                                                                                                                                                                                                                                                                                                                                                                                                                                                                                                                                                                                                                                                                                                                                                                                                                                                                                                                                                                                                                                                                                                                                                                                                                                                                                             |
| Keywords:                       | Public health < INFECTIOUS DISEASES, Infection control < INFECTIOUS DISEASES, Gastrointestinal tumours < ONCOLOGY                                                                                                                                                                                                                                                                                                                                                                                                                                                                                                                                                                                                                                                                                                                                                                                                                                                                                                                                                                                                                                                                                                                                                                                                                                                                                                                                                              |
|                                 |                                                                                                                                                                                                                                                                                                                                                                                                                                                                                                                                                                                                                                                                                                                                                                                                                                                                                                                                                                                                                                                                                                                                                                                                                                                                                                                                                                                                                                                                                |

1  
2  
3  
4  
5  
6  
7  
8  
9  
10  
11  
12  
13  
14  
15  
16  
17  
18  
19  
20  
21  
22  
23  
24  
25  
26  
27  
28  
29  
30  
31  
32  
33  
34  
35  
36  
37  
38  
39  
40  
41  
42  
43  
44  
45  
46  
47  
48  
49  
50  
51  
52  
53  
54  
55  
56  
57  
58  
59  
60

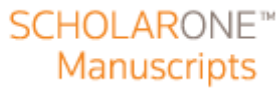



I, the Submitting Author has the right to grant and does grant on behalf of all authors of the Work (as defined in the below author licence), an exclusive licence and/or a non-exclusive licence for contributions from authors who are: i) UK Crown employees; ii) where BMJ has agreed a CC-BY licence shall apply, and/or iii) in accordance with the terms applicable for US Federal Government officers or employees acting as part of their official duties; on a worldwide, perpetual, irrevocable, royalty-free basis to BMJ Publishing Group Ltd ("BMJ") its licensees and where the relevant Journal is co-owned by BMJ to the co-owners of the Journal, to publish the Work in this journal and any other BMJ products and to exploit all rights, as set out in our [licence](#).

The Submitting Author accepts and understands that any supply made under these terms is made by BMJ to the Submitting Author unless you are acting as an employee on behalf of your employer or a postgraduate student of an affiliated institution which is paying any applicable article publishing charge ("APC") for Open Access articles. Where the Submitting Author wishes to make the Work available on an Open Access basis (and intends to pay the relevant APC), the terms of reuse of such Open Access shall be governed by a Creative Commons licence – details of these licences and which [Creative Commons](#) licence will apply to this Work are set out in our licence referred to above.

Other than as permitted in any relevant BMJ Author's Self Archiving Policies, I confirm this Work has not been accepted for publication elsewhere, is not being considered for publication elsewhere and does not duplicate material already published. I confirm all authors consent to publication of this Work and authorise the granting of this licence.

1  
2  
3  
4  
5  
6  
7  
8  
9  
10  
11  
12  
13  
14  
15  
16  
17  
18  
19  
20  
21  
22  
23  
24  
25  
26  
27  
28  
29  
30  
31  
32  
33  
34  
35  
36  
37  
38  
39  
40  
41  
42  
43  
44  
45  
46  
47  
48  
49  
50  
51  
52  
53  
54  
55  
56  
57  
58  
59  
60

1 **What is the general Chinese public's awareness of and attitudes towards**  
2 ***Helicobacter pylori* screening and associated health behaviours? A cross-sectional**  
3 **study**

4  
5 **Authors:** Ying-xin Wang<sup>1\*</sup>, Jin-yu Zou<sup>1\*</sup>, Li-feng Hu<sup>1</sup>, Qi Liu<sup>1,4</sup>, Ruo-lin Huang<sup>1</sup>,  
6 Tian Tang<sup>1</sup>, Qian-qian Yue<sup>1</sup>, Ying-xue Sun<sup>1</sup>, Qiao Xiao<sup>1</sup>, Xi Zeng<sup>2,3\*</sup>, Ying Zeng<sup>1,2\*</sup>.

7 1. Department of International and Humanistic Nursing, School of Nursing, Hengyang  
8 Medical School, University of South China, Hengyang, China.

9 2. Hunan Province Key Laboratory of Tumor Cellular & Molecular Pathology,  
10 Cancer Research Institute, Hengyang Medical School, University of South China,  
11 Hengyang, China.

12 3. Hunan Province Cooperative innovation Center for Molecular Target New Drug  
13 Study, Hengyang Medical School, University of south china, Hengyang, China.

14 4. School of Nursing, The Hong Kong Polytechnic University, Kowloon, Hong Kong

15 \*These authors have contributed equally to this work.

16 Correspondence to Ying Zeng, E-mail: zengying2003@126.com; Xi Zeng, E-mail:  
17 zx397@126.com.

18  
19 **Author details**

20 Ying-xin Wang, Postgraduate, RN. School of Nursing, University of South China,  
21 Hengyang, China. E-mail: 1574567070@qq.com

22 Jin-yu Zou, Postgraduate, RN. School of Nursing, University of South China,  
23 Hengyang, China. E-mail: 1395027157@qq.com

24 **Corresponding author 1:** Ying Zeng, RN, PhD, Professor. Department of  
25 International and Humanistic Nursing, School of Nursing, Hengyang Medical School,  
26 University of South China, Hengyang, PR China. Tel: +86 17773486339, E-mail:  
27 zengying2003@126.com Fax: 0734-8281344

28 **Corresponding author 2:** Xi Zeng, MD, PhD, Professor, Hunan Province Key  
29 Laboratory of Tumor Cellular & Molecular Pathology, Cancer Research Institute,  
30 Hengyang Medical School, University of South China, Hengyang, China. Tel: +86  
31 17773486769, E-mail: zx397@126.com.

32 Li-feng Hu, Postgraduate, RN. E-mail: 2889113208@qq.com

33 Qi Liu, Postgraduate, RN. E-mail: 1570364856@qq.com.

34 Ruo-lin Huang, Postgraduate, RN. E-mail: 2412596805@qq.com

35 Tian Tang, Postgraduate, RN. E-mail: 1981313616@qq.com

36 Qian-qian Yue, Postgraduate, RN. E-mail: 1835301002@qq.com

37 Ying-xue Sun, Postgraduate, RN. E-mail: 221332812@qq.com

38 Qiao Xiao, Postgraduate, E-mail: 2838699068@qq.com

39  
40 **Word count: 4315**

## 1 Abstract

2 **Objective:** To evaluate the general population's awareness of and attitudes toward  
3 *Helicobacter pylori* (HP) screening and health behaviours.

4 **Design:** Cross-sectional study

5 **Setting:** Hengyang, Hunan Province, China

6 **Participants:** Using stratified cluster random sampling, a pre-tested structured  
7 questionnaire was used to interview members of the general population aged  $\geq 18$  years.

8 **Primary and secondary outcome measures:** Knowledge of and attitudes toward HP  
9 screening and associated health behaviours, sociodemographic factors associated with  
10 HP knowledge, and screening behaviours.

11 **Results:** This study featured 1,042 participants. The average knowledge score was 11  
12 ( $Q_L=4$ ,  $Q_U=20$ , range 0–29). Approximately 68.9% of the participants said they had  
13 heard of HP, but 67.5% had never had a HP test. The most common reasons for not  
14 undergoing screening were 'no symptoms' (55.7%) and 'lack of knowledge regarding  
15 the benefits of the test' (21.1%). Independent factors related to knowledge included  
16 age, education level, occupation, HP infection, frequency of drinking unboiled water  
17 ( $p<0.05$ ). Factors independently associated with screening behaviour included  
18 occupation, average monthly income, presence/absence of indigestion, stomach  
19 discomfort or pain, and/or stomach disease and knowledge score ( $p<0.05$ ). Overall, 941  
20 (90.3%) participants never used anti-HP toothpaste, and 442 (40.5%) never used  
21 serving spoons or chopsticks. The risk factors for HP infection included eating out and  
22 eating in groups ( $p<0.05$ ).

23 **Conclusion:** In China, the general population has poor knowledge of HP, but most  
24 people have a positive attitude towards HP screening. Being asymptomatic and lacking  
25 knowledge about testing were the main reasons for reluctance to be screened. These  
26 results highlight the urgent need for educational activities to raise awareness, enhance  
27 screening rates for HP, and encourage people to adopt a healthy lifestyle.

28 **Keywords:** *Helicobacter pylori* screening, general population, awareness, health  
29 behaviours, gastric cancer

## 30 Strengths and limitations of this study

- 31 • The results may be used as a reference for other countries with high HP  
32 infection rates and no screening programmes.
- 33 • As the participants' information was self-reported, recall bias may have been  
34 present.
- 35 • Only quantitative measurements were conducted.
- 36 • Other factors related to screening behaviour, such as culture and health  
37 beliefs, were not explored.

## 1 INTRODUCTION

2 *Helicobacter pylori* (HP) infection is a major risk factor for chronic gastritis, gastric  
3 cancer (GC) and peptic ulcer,<sup>1</sup> and HP infection has become a global public health  
4 problem.<sup>2</sup> The main mechanism of HP transmission is direct person-to-person.<sup>3</sup>  
5 Globally, the average HP infection rate is 44.3%; 50.8% in developing countries and  
6 34.7% in developed countries.<sup>4</sup> In 2015, approximately 4.4 billion people worldwide  
7 had HP infections, among whom approximately 700 million were in China; the total  
8 HP infection rate in China was 55.8%, higher than the mean global prevalence.<sup>2</sup>

9 GC is the sixth-most-common malignant tumour and the fourth-most-common  
10 cause of cancer-related deaths worldwide, and has a relatively poor prognosis.<sup>5</sup> Most  
11 patients with GC in China are diagnosed at an advanced stage.<sup>6</sup> The Kyoto Global  
12 consensus<sup>7</sup> reported that HP infection is closely related to GC, and that eradication of  
13 HP is beneficial for reducing GC incidence.<sup>8</sup> Further, a meta-analysis showed that  
14 eradication of HP can reduce GC incidence in healthy individuals and patients with  
15 gastric neoplasia, and can also reduce GC mortality.<sup>9</sup> Therefore, improving HP-  
16 screening rates and providing early diagnosis and treatment are essential for GC  
17 prevention.

18 However, although eradication of HP to prevent GC has a cost - benefit  
19 advantage,<sup>10</sup> China lacks national policies or protocols for HP in GC screening.<sup>11</sup> HP  
20 infection is usually asymptomatic,<sup>12</sup> and China has a large population and relatively  
21 poor medical and health resources; therefore, opportunistic screening of asymptomatic  
22 people is currently the main approach.<sup>13,14</sup> Such opportunistic screening is performed  
23 on a voluntary basis, based on an individual or physician's request.<sup>14</sup> The screening rate  
24 for HP in China (21.7%) is far from satisfactory,<sup>15</sup> and the general population's lack of  
25 awareness of HP risk factors or symptoms and negative attitude towards screening  
26 contribute to delays in diagnosis.<sup>11</sup>

27 Studies<sup>15-20</sup> have shown that the general population has poor awareness of HP.  
28 surveys of Chinese people have reported that only 22–35% have ever heard of HP.<sup>16,20</sup>  
29 Further, only 37% of medical residents in the US feel they have sufficient knowledge



1 regarding HP, and just 22% would consider being tested for HP if they had no specific  
2 upper gastrointestinal symptoms.<sup>21</sup> In a survey of migrant workers in China, in which  
3 participants were tested for HP, only 2% of those who returned positive HP results  
4 reported being previously tested for HP.<sup>20</sup> Meanwhile, a survey of Chinese physicians  
5 and the general public found that 69.8% of the participants had at least one lifestyle  
6 habit associated with a risk of HP infection.<sup>15</sup> Level of awareness not only affects the  
7 HP-screening rate, but also engagement in associated health behaviours.<sup>15,17,22</sup> Thus, to  
8 promote the primary prevention of GC, it is critical to improve knowledge levels  
9 regarding HP and associated health behaviours, thereby improving the HP-screening  
10 rate.

11 There is little information regarding the general Chinese population's knowledge  
12 and screening intentions concerning HP. Hence, this study aimed to evaluate the general  
13 population's awareness of HP, their attitudes toward HP screening, and investigate  
14 health behaviours and factors related to HP knowledge and screening behaviours.

## 15 **METHODS**

### 16 **Setting and sample**

17 This was a cross-sectional study was conducted between June and October 2020. The  
18 minimum sample size was calculated to be 726. This was determined using the formula  
19  $N = [\mu_a^2 \times \pi \times (1 - \pi)] / \delta^2$ ,<sup>23</sup> in which the prevalence rate of 21.7% ( $\pi$ ) was based on the HP-  
20 screening rate for the general population, the significance level was 0.05 ( $\alpha$ ), and the  
21 allowable error was 0.03 ( $\delta$ ). Considering a non-response rate of 40%, the final sample  
22 size was determined to be 1,016.

23 Using stratified cluster random sampling, 12 community health-service centres  
24 were randomly selected from the 22 such centres in Hengyang city, China. Eighty-five  
25 patients from each centre were approached for participation. We recruited 12  
26 interviewers with a medical background and experience of investigation, and trained  
27 them in HP-related knowledge and interview skills. With the consent of the community  
28 health-service centres, each trained interviewer was accompanied by medical staff (a  
29

1 doctor or nurse) and approached patients for participation. The inclusion criteria were:  
2  $\geq 18$  years of age, able to communicate effectively, and willing to voluntarily participate.  
3 The exclusion criterion was having a GC diagnosis.

#### 5 **Study instrument**

6 The questionnaire included items on awareness, attitudes, and health behaviours related  
7 to HP. The survey items were identified through a literature review and expert  
8 consultation.<sup>7,24</sup> The questionnaire comprised four parts: (1) Socio-demographic  
9 characteristics, including gender, residence, marital status, education level, occupation,  
10 income, family history of GC, and HP-infection status, etc. (2) 23 questions concerning  
11 knowledge of the harmfulness of HP, methods and benefits of HP treatment, HP  
12 transmission routes, and the methods of detecting and preventing HP methods. Twenty-  
13 one items were single-choice questions; two were multiple-choice questions. One point  
14 was awarded for each correct answer, and zero points were awarded for incorrect or 'do  
15 not know' answers. The maximum total score was 29 points. The respondents'  
16 knowledge level was categorised as follows: 0–10=low knowledge, 11–19=moderate  
17 knowledge, 20–29=high knowledge.<sup>25</sup> (3) perceptions of HP detection, featuring nine  
18 questions: (i) 'Do you think HP infection can be prevented?' (possible responses: 'yes',  
19 'no', 'do not know'); (ii) 'Do you think HP infections can be cured?' ('yes', 'no', 'do  
20 not know'); (iii) 'Have you ever been tested for HP?' ('yes', 'no'); (iv) 'Do you think  
21 the HP test can accurately detect HP infection?' ('yes', 'no', 'do not know'); (v) 'Which  
22 HP test do you prefer?' ('<sup>13</sup>C-urea breath test', 'stool test', 'blood test', 'endoscopic  
23 biopsy', 'none', 'do not know'); (vi) 'Has your doctor discussed HP testing with you?'  
24 ('yes', 'no', 'do not remember); (vii) 'Would you like to undertake a HP test?' ('yes',  
25 'no'); (viii) 'Why do you not want to undertake a HP test?' ('lack of knowledge  
26 regarding the benefits of the test', 'a positive test would cause psychological burden',  
27 'I have no symptoms', 'lack of time', 'economic reasons', 'other'); and (ix) 'If you  
28 tested positive for HP, would you be willing to receive treatment?' ('yes', 'no'). (4)  
29 Health behaviours: including whether the participants had a salty diet; ate pickles,  
30 vegetables, fruits, or sweets; used anti-HP toothpaste, brushed their teeth, drank  
31 unboiled water (well or river water); ate frequently; ate out; had group meals; used  
32 serving spoons and chopsticks; disinfected household tableware; regularly washed their

1 hands; smoked; and drank alcohol.

2 The questionnaire's reliability was assessed by pre-testing it on 100 adults. The  
3 internal consistency was determined by estimating the Cronbach's alpha, which was  
4 found to be 0.84. The validity of the questionnaire was evaluated using structural and  
5 content validity. The calculated Kaiser-Meyer-Olkin value was 0.886, and the  
6 cumulative variance contribution rate was 70%. The item-content-validity-index was  
7 0.81–1; the scale-content-validity-index was 0.914. Based on feedback from the pre-  
8 test, the questionnaire was revised and re-evaluated.

### 9 10 **Data analysis**

11 Data were analysed using SPSS version 23. Sociodemographic characteristics and item  
12 responses were described in terms of frequencies and percentages. Associations among  
13 sociodemographic characteristics and HP knowledge and screening behaviour, and  
14 between participants' health behaviours and HP infection, were analysed using chi-  
15 square tests or Fisher's exact test. Variables with  $P \leq 0.15$  in univariate analysis were  
16 entered into multivariate logistic regression analysis to investigate the independent  
17 factors affecting knowledge, behaviour, and HP infection. The multivariate-analysis  
18 results were presented using odds ratios (ORs) and 95% confidence intervals (CIs), and  
19 statistical significance was set at  $p < 0.05$ .

### 20 21 **Patient and public involvement**

22 None of the participants were involved in the design or development of the study  
23 questions or outcome measures, or in the recruitment or implementation of the study.  
24 The results will be sent to interested participants via text message.

### 25 26 **Ethics approval**

27 This study was approved by the Ethics Committee of the University of South China  
28 (number 4304082008946) and informed consent was obtained from participants before  
29 participation.

1

2 **RESULTS**3 **Participants' sociodemographic characteristics**

4 From June to October 2020, 1,100 individuals consented to participate in this study.

5 After removing incomplete answers, 1,042 valid questionnaires remained. The final

6 response rate was 95%. The participants' mean age was 35.40±13.3 years (range=18-

7 78 years). Over half (62.6%) were women, 47% had high-school education or below,

8 61.4% lived in rural areas and 48% had low income<sup>26,27</sup>. Sixty-seven (6.4%) had a

9 family history of GC, 501 (48.1%) had symptoms of dyspepsia, stomach discomfort, or

10 pain; 124 (11.9%) had HP infection, and 255 (24.5%) had a definite diagnosis of gastric

11 disease. The remaining variables are listed in (Table 1).

12

13 **Table 1 Participant characteristics (n=1042)**

| Characteristics                                | N (%)      |
|------------------------------------------------|------------|
| <b>Sex</b>                                     |            |
| Male                                           | 390 (37.4) |
| Female                                         | 652 (62.6) |
| <b>Ages(years)</b>                             |            |
| 18-36                                          | 584 (56.0) |
| 36-60                                          | 412 (39.5) |
| ≥60                                            | 46 (4.5)   |
| <b>Education level</b>                         |            |
| Primary school and below                       | 86 (8.3)   |
| Secondary school or technical secondary school | 403 (38.7) |
| University or junior college                   | 486 (46.6) |
| Graduate student or above                      | 67 (6.4)   |
| <b>Occupation</b>                              |            |
| State functionary                              | 60 (5.8)   |
| Company staff                                  | 185 (17.8) |
| Teacher                                        | 73 (7.0)   |
| Medical staff                                  | 103 (9.9)  |
| Worker                                         | 79 (7.6)   |
| Farmer                                         | 117 (11.2) |
| Self-employed                                  | 75 (7.2)   |
| Student                                        | 194 (18.6) |
| Other                                          | 156 (15.0) |
| <b>Marital status</b>                          |            |

7 / 27

|                                         |            |
|-----------------------------------------|------------|
| Single                                  | 378 (36.3) |
| Married                                 | 638 (61.3) |
| Divorced                                | 13 (1.2)   |
| Widowed                                 | 13 (1.2)   |
| Residence                               |            |
| Urban                                   | 640 (61.4) |
| Rural                                   | 402 (38.6) |
| Income (¥)                              |            |
| <3000                                   | 500 (48.0) |
| 3000-5000                               | 302 (29.0) |
| 5000-10000                              | 187 (17.9) |
| ≥10000                                  | 53 (5.1)   |
| Family history of gastric cancer        |            |
| Yes                                     | 67 (6.4)   |
| No                                      | 975 (93.6) |
| Health status                           |            |
| Unhealthy                               | 374 (35.9) |
| Suboptimal                              | 605 (58.1) |
| Healthy                                 | 63 (6.0)   |
| Indigestion, stomach discomfort or pain |            |
| Yes                                     | 501 (48.1) |
| No                                      | 541 (51.9) |
| <i>Helicobacter pylori</i> infection    |            |
| Yes                                     | 124 (11.9) |
| No                                      | 215 (20.6) |
| Undetected                              | 703 (67.5) |
| Related diseases of stomach             |            |
| Yes                                     | 255 (24.5) |
| No                                      | 600 (57.6) |
| Do not know                             | 187 (17.9) |
| Stress                                  |            |
| No stress                               | 161 (15.5) |
| Low                                     | 237 (22.7) |
| Moderate                                | 545 (52.3) |
| High                                    | 99 (9.5)   |

1

## 2 Knowledge of *Helicobacter pylori*

3 Table 2 presents the participants' knowledge of HP, including general knowledge,  
 4 awareness of HP detection and prevention methods, and indications for screening and  
 5 treatment. The average knowledge score was 11 ( $Q_L=4$ ,  $Q_U=20$ , range: 0–29). Of the  
 6 1042 respondents, 495 (47.5%), 370 (25.9%) and 277 (26.6%) had low, moderate and  
 8 / 27

1 high knowledge of HP, respectively. Overall, 718 (68.9%) had heard of HP; however,  
2 703 (67.5%) had never been tested HP. Less than 40% thought that HP infection could  
3 cause gastritis and other malignancies, or that treatment of HP prevents GC. Only 283  
4 (27.2%) knew about HP treatment methods. Less than 50% knew that HP could be  
5 transmitted via fecal-oral or oral transmission. Participants were also relatively unaware  
6 of the three HP-detection methods: blood test (17.2%), stool test (29.5%), and  
7 gastroscopic biopsy (33.9%). The most recognised indications for screening and  
8 treatment were HP infection (55.9%), followed by chronic gastritis (47.0%-47.4%), and  
9 peptic ulcer (47.0%). Less well-recognised indications were long-term use of proton-  
10 pump inhibitors (24.3%), planned long-term use of non-steroidal anti-inflammatory  
11 drugs (22.6%), unknown causes of iron deficiency anaemia (19.8%), and idiopathic  
12 thrombocytopenic purpura (17.6%).

13 Table 3 shows the results of the multivariate analysis of factors related to HP  
14 knowledge. Univariate analysis showed that sex, age, education level, occupation,  
15 residence, average monthly income, HP-infection status, stress status, frequency of  
16 eating out, use of serving spoons and chopsticks, smoking and other factors were  
17 significantly associated with HP knowledge ( $p < 0.05$ ). These factors plus variables with  
18  $p < 0.15$  in the univariate analysis were entered into the multivariate logistic regression  
19 model. The independent variables related to knowledge included age, education level,  
20 occupation, HP infection, frequency of drinking unboiled water ( $p < 0.05$ , table 3).

21 Participants who were found to be less knowledgeable about HP include male sex  
22 (OR 0.63, 95%CI 0.45 to 0.89), and those who had a lower educational level (primary  
23 school and below: OR 0.004, 95%CI 0.001 to 0.03). Participants who were more  
24 knowledgeable about HP included medical professionals (OR 17.68, 95%CI 2.15 to  
25 145.48), students (OR 2.849, 95%CI 1.318 to 6.518), and those who drinking unboiled  
26 water usually (never /occasionally drinking unboiled water: OR 0.427, 95%CI 0.200 to  
27 0.912; OR 0.279, 95%CI 0.123 to 0.633). Participants with (OR 4.37, 95%CI 2.44 to  
28 7.82) and without (OR 1.95, 95%CI 1.30 to 2.93) HP infections had better knowledge  
29 about HP than those who had never been tested for HP.

1

2 **Table 2 Participants' knowledge about *Helicobacter pylori* (n=1042)**

| Category                                                                                                                                                                                                                              | Yes | %    |
|---------------------------------------------------------------------------------------------------------------------------------------------------------------------------------------------------------------------------------------|-----|------|
| <b>General knowledge</b>                                                                                                                                                                                                              |     |      |
| Have you ever heard of <i>Helicobacter pylori</i> ?                                                                                                                                                                                   | 718 | 68.9 |
| <i>Helicobacter pylori</i> infection can cause <i>Helicobacter pylori</i> -related gastritis                                                                                                                                          | 400 | 38.4 |
| <i>Helicobacter pylori</i> infection can cause other malignant tumors                                                                                                                                                                 | 346 | 33.2 |
| Treatment of <i>Helicobacter pylori</i> infection can prevent gastric cancer                                                                                                                                                          | 388 | 37.2 |
| Untreated <i>Helicobacter pylori</i> infection may lead to gastric cancer                                                                                                                                                             | 473 | 45.4 |
| <i>Helicobacter pylori</i> infection-related gastritis can cause abdominal pain, abdominal distension, acid reflux, belching and other symptoms                                                                                       | 419 | 40.2 |
| <i>Helicobacter pylori</i> infection can be transmitted through fecal-oral transmission                                                                                                                                               | 481 | 46.2 |
| <i>Helicobacter pylori</i> infection can be transmitted through oral-to-oral                                                                                                                                                          | 506 | 48.6 |
| The main treatments for <i>Helicobacter pylori</i> infection are: two antibiotics (such as amoxicillin + clarithromycin) + proton pump inhibitors (such as omeprazole or pantoprazole) + bismuth (such as bismuth potassium citrate). | 283 | 27.2 |
| <b>Awareness of <i>Helicobacter pylori</i> detection and prevention</b>                                                                                                                                                               |     |      |
| Which of the following methods can detect <i>Helicobacter pylori</i> infection? (multiple-choice possible)                                                                                                                            |     |      |
| 13C-urea breath test                                                                                                                                                                                                                  | 529 | 50.8 |
| Stool tests                                                                                                                                                                                                                           | 307 | 29.5 |
| Blood tests                                                                                                                                                                                                                           | 179 | 17.2 |
| Gastroscopic biopsies                                                                                                                                                                                                                 | 353 | 33.9 |
| Do not know                                                                                                                                                                                                                           | 368 | 35.3 |
| Which of the following measures can prevent <i>Helicobacter pylori</i> infection?                                                                                                                                                     |     |      |
| Wash hands before and after meals                                                                                                                                                                                                     | 678 | 65.1 |
| Use chopsticks and separate meals when eating                                                                                                                                                                                         | 673 | 64.6 |
| High temperature disinfection of tableware                                                                                                                                                                                            | 669 | 64.2 |
| Avoid eating/drinking dirty food and water                                                                                                                                                                                            | 644 | 61.8 |
| Do not know                                                                                                                                                                                                                           | 296 | 28.4 |
| <b>Indications for screening and treatment:</b>                                                                                                                                                                                       |     |      |
| Peptic ulcers                                                                                                                                                                                                                         | 490 | 47.0 |
| Primary malignant lymphoma of stomach                                                                                                                                                                                                 | 395 | 37.9 |

10 / 27

|                                                                                                       |     |      |
|-------------------------------------------------------------------------------------------------------|-----|------|
| Chronic gastritis with dyspepsia                                                                      | 490 | 47.0 |
| Chronic gastritis with atrophy and erosion of gastric mucosa                                          | 494 | 47.4 |
| Early gastric tumors have been resected under endoscope or subtotal gastrectomy.                      | 319 | 30.6 |
| Long-term use of proton-pump inhibitors (omeprazole, pantoprazole, etc.)                              | 253 | 24.3 |
| Family history of gastric cancer                                                                      | 428 | 41.1 |
| Plan to take long-term non-steroidal anti-inflammatory drugs (aspirin, celecoxib, indomethacin, etc.) | 236 | 22.6 |
| Iron deficiency anaemia of unknown cause                                                              | 206 | 19.8 |
| Idiopathic thrombocytopenic purpura                                                                   | 183 | 17.6 |
| Other <i>Helicobacter pylori</i> related diseases                                                     | 441 | 42.3 |
| <i>Helicobacter pylori</i> infection was confirmed by test.                                           | 582 | 55.9 |
| <b>Knowledge level (29 points)</b>                                                                    |     |      |
| Low (0-10)                                                                                            | 495 | 47.5 |
| Moderate (11-19)                                                                                      | 270 | 25.9 |
| High (20-29)                                                                                          | 277 | 26.6 |

1

2 **Table 3 Logistic multiple regression of factors associated with *Helicobacter pylori***  
 3 **related knowledge (n=1042)**

| Variable                                       | $\beta$ | SE    | OR     | 95%CI            | P                |
|------------------------------------------------|---------|-------|--------|------------------|------------------|
| <b>Sex</b>                                     |         |       |        |                  |                  |
| Male                                           | -0.774  | 0.242 | 0.461  | 0.287 to 0.741   | <b>0.001</b>     |
| Female                                         |         |       |        | 1 (ref)          |                  |
| <b>Education level</b>                         |         |       |        |                  |                  |
| Primary school and below                       | -5.241  | 0.931 | 0.005  | 0.001 to 0.034   | <b>&lt;0.001</b> |
| Secondary school or technical secondary school | -3.022  | 0.579 | 0.049  | 0.016 to 0.152   | <b>&lt;0.001</b> |
| University or junior college                   | -1.715  | 0.515 | 0.180  | 0.066 to 0.494   | <b>0.001</b>     |
| Graduate student or above                      |         |       |        | 1 (ref)          |                  |
| <b>Occupation</b>                              |         |       |        |                  |                  |
| State functionary                              | 0.362   | 0.442 | 1.436  | 0.603 to 3.416   | 0.414            |
| Company staff                                  | 0.364   | 0.317 | 1.439  | 0.773 to 2.680   | 0.252            |
| Teacher                                        | 0.684   | 0.407 | 1.982  | 0.893 to 4.398   | 0.093            |
| Medical staff                                  | 3.310   | 1.092 | 27.391 | 3.222 to 232.840 | <b>0.002</b>     |
| Worker                                         | -0.158  | 0.401 | 0.854  | 0.389 to 1.872   | 0.693            |
| Farmer                                         | 0.570   | 0.373 | 1.769  | 0.852 to 3.670   | 0.126            |
| Self-employed                                  | 0.242   | 0.385 | 1.273  | 0.599 to 2.709   | 0.530            |
| Student                                        | 1.047   | 0.393 | 2.849  | 1.318 to 6.518   | <b>0.008</b>     |
| Other                                          |         |       |        | 1 (ref)          |                  |

11 / 27



|                               |        |       |       |                |                  |
|-------------------------------|--------|-------|-------|----------------|------------------|
| Helicobacter pylori infection |        |       |       |                |                  |
| Yes                           | 1.474  | 0.297 | 4.369 | 2.440 to 7.821 | <b>&lt;0.001</b> |
| No                            | 0.669  | 0.207 | 1.953 | 1.303 to 2.927 | <b>0.001</b>     |
| Undetected                    |        |       |       | 1 (ref)        |                  |
| Drinking unboiled water       |        |       |       |                |                  |
| Never                         | -0.851 | 0.387 | 0.427 | 0.200 to 0.912 | <b>0.028</b>     |
| Occasionally                  | -1.278 | 0.419 | 0.279 | 0.123 to 0.633 | <b>0.002</b>     |
| Usual                         |        |       |       | 1 (ref)        |                  |

1 Bold figures indicate the statistically significant findings ( $p < 0.05$ ).

2 CI, confidence interval; SE, standard error; ref, reference.

3

#### 4 **Attitudes towards *Helicobacter pylori* screening**

5 Table 4 shows the participants' attitudes toward HP screening. Most held a positive  
 6 attitude towards HP screening. Over 60% believed that HP infection could be prevented  
 7 or cured, and that testing could accurately detect HP infection. The most commonly  
 8 accepted test (56.9%) was 13C-urea breath test; 16% knew nothing about HP tests.  
 9 When participants were asked if their doctor had discussed HP testing with them,  
 10 almost 70% said no. However, 72.3% indicated that they would like to have a HP test.  
 11 Furthermore, 96.3% said they were willing to receive treatment if they tested positive  
 12 for HP. Only 289 (27.7%) were reluctant to undergo HP testing (because they had no  
 13 symptoms [55.7%] and lacked knowledge regarding the test's benefits [21.1%]).

14 Table 5 shows the results of the multivariate analysis of the factors associated with  
 15 HP detection. Univariate analysis showed that age, occupation, marital status, residence,  
 16 average monthly income, family history of GC, health status, indigestion, stomach  
 17 discomfort or pain, and stomach disease, and knowledge scores were related to HP  
 18 detection. These factors plus variables with  $p < 0.15$  in the univariate analysis were  
 19 entered into the multivariate logistic regression model. The independent variables  
 20 related to HP-detection behaviour included occupation, average monthly income,  
 21 indigestion, stomach discomfort or pain, and stomach disease, and knowledge scores.

22 Participants who were less likely to undertake HP tests included workers, students,  
 23 and farmers (OR 0.925, 95%CI 0.867 to 0.988), and those with low monthly income  
 24 (OR 0.712, 95%CI 0.607 to 0.835) and low knowledge scores (OR 0.602, 95%CI 0.507

1 to 0.716); those with symptoms of stomach discomfort (OR 1.744, 95%CI 1.279 to 2.379) and stomach-related diseases (OR 3.326, 95%CI 2.578 to 4.292) were more likely to undertake the HP test.

4

5 **Table 4 *Helicobacter pylori* screening attitudes among participants (n=1042)**

| Question                                                     | Number | %    |
|--------------------------------------------------------------|--------|------|
| Do you think HP infections can be prevented?                 |        |      |
| Yes                                                          | 782    | 75.0 |
| No                                                           | 40     | 3.8  |
| Do not know                                                  | 220    | 21.1 |
| Do you think HP infections can be cured?                     |        |      |
| Yes                                                          | 770    | 73.9 |
| No                                                           | 49     | 4.7  |
| Do not know                                                  | 223    | 21.4 |
| Have you ever been tested for HP?                            |        |      |
| Yes                                                          | 284    | 27.3 |
| No                                                           | 758    | 72.7 |
| Do you think the HP test can accurately detect HP infection? |        |      |
| Yes                                                          | 698    | 67.0 |
| No                                                           | 62     | 6.0  |
| Do not know                                                  | 282    | 27.1 |
| Which HP test do you prefer?                                 |        |      |
| 13C-urea breath test                                         | 593    | 56.9 |
| Stool tests                                                  | 93     | 8.90 |
| Blood tests                                                  | 133    | 12.8 |
| Endoscopic biopsy                                            | 35     | 3.4  |
| None acceptable                                              | 21     | 2.0  |
| Do not know                                                  | 167    | 16.0 |
| Has your doctor discussed HP testing with you?               |        |      |
| Yes                                                          | 215    | 20.6 |
| No                                                           | 725    | 69.6 |
| Do not remember                                              | 102    | 9.8  |
| Would you like to undertake a HP test?                       |        |      |
| Yes                                                          | 753    | 72.3 |
| No                                                           | 289    | 27.7 |
| Why do you not want to undertake a HP test (n=289)*          |        |      |
| Lacking of knowledge regarding benefits of the test          | 61     | 21.1 |
| Confirming the disease would induce psychological burden     | 22     | 7.6  |
| No symptoms                                                  | 161    | 55.7 |
| Lacking of time                                              | 22     | 7.6  |
| Economic reason                                              | 14     | 4.8  |

13 / 27

|                                                                            |      |      |
|----------------------------------------------------------------------------|------|------|
| Other                                                                      | 9    | 3.1  |
| If your tested positive for HP, would you be willing to receive treatment? |      |      |
| Yes                                                                        | 1003 | 96.3 |
| No                                                                         | 39   | 3.7  |

1 \*Participants who don't want to undertake test of HP.

2 HP, helicobacter pylori

3

4 **Table 5 Bivariate analysis of factors associated with *Helicobacter pylori* detection**  
5 **behavior (n=1042)**

| Variable                                       | Screened<br>N (%) | Unscreened<br>N (%) | OR    | 95%CI          | P        |
|------------------------------------------------|-------------------|---------------------|-------|----------------|----------|
| <b>Occupation</b>                              |                   |                     |       |                |          |
| State functionary                              | 21 (35.0)         | 39 (65.0)           |       |                |          |
| Company staff                                  | 51 (27.6)         | 134 (72.4)          |       |                |          |
| Teacher                                        | 21 (28.8)         | 52 (71.2)           |       |                |          |
| Medical staff                                  | 29 (28.2)         | 74 (71.8)           |       |                |          |
| Worker                                         | 14 (17.7)         | 65 (82.3)           | 0.925 | 0.867 to 0.988 | 0.020*   |
| Farmer                                         | 26 (22.2)         | 91 (77.8)           |       |                |          |
| Self-employed                                  | 30 (40.0)         | 45 (60.0)           |       |                |          |
| Student                                        | 39 (20.1)         | 155 (79.9)          |       |                |          |
| Other                                          | 53 (34.0)         | 103 (66.0)          |       |                |          |
| <b>Income (¥)</b>                              |                   |                     |       |                |          |
| <3000                                          | 114 (22.8)        | 386 (77.2)          |       |                |          |
| 3000-5000                                      | 82 (27.2)         | 200 (72.8)          |       |                |          |
| 5000-10000                                     | 66 (35.3)         | 121 (64.7)          | 0.715 | 0.589 to 0.867 | 0.001*   |
| ≥10000                                         | 22 (41.5)         | 31 (68.5)           |       |                |          |
| <b>Indigestion, stomach discomfort or pain</b> |                   |                     |       |                |          |
| Yes                                            | 181 (36.1)        | 320 (61.9)          | 1.523 | 1.093 to 2.122 | 0.013*   |
| No                                             | 103 (19.0)        | 438 (81.8)          |       |                |          |
| <b>Related diseases of stomach</b>             |                   |                     |       |                |          |
| Yes                                            | 145 (56.9)        | 110 (43.1)          |       |                |          |
| No                                             | 115 (19.2)        | 485 (80.8)          | 3.094 | 2.384 to 4.015 | < 0.001* |
| Don't know                                     | 24 (12.8)         | 163 (87.2)          |       |                |          |
| <b>Knowledge level</b>                         |                   |                     |       |                |          |
| High                                           | 101 (36.5)        | 176 (63.5)          |       |                |          |
| Moderate                                       | 96 (35.6)         | 174 (64.4)          | 0.582 | 0.479 to 0.707 | < 0.001* |
| Low                                            | 87 (16.4)         | 408 (82.4)          |       |                |          |

6 \*Statistically significant at P<0.05.

7 CI, confidence interval; OR, odds ratio.

8

## 1 Health behaviours

2 Over half of the participants (553; 53.1%) reported a fruit intake of <200g/day  
3 (recommended intake for Chinese residents<sup>28</sup>). Meanwhile, 941 (90.3%) never used  
4 anti-HP toothpaste, and 253 (24.3%) brushed their teeth once a day. Further, 203  
5 (19.5%) participants often eat out and 418 (40.1%) often ate in groups, 442 (40.5%)  
6 never used serving spoons or chopsticks, and 460 (44.1%) never sterilised their home  
7 tableware (Table 6).

8 Table 7 shows the results of the multivariate analysis of factors related to HP  
9 infection. The risk factors for HP infection were eating out (OR 0.512, 95%CI 0.322-  
10 0.816) and group eating (OR 0.564, 95%CI 0.384-0.827).

11  
12 **Table 6 Health related behaviors of general population (n=1042)**

| Health related behaviors          | N (%)      |
|-----------------------------------|------------|
| Salty diet                        |            |
| Light                             | 502 (48.2) |
| More salty                        | 513 (49.2) |
| Very salty                        | 27 (2.6)   |
| Consumption of pickled foods      |            |
| Never                             | 97 (9.3)   |
| Occasionally                      | 848 (81.4) |
| Usual                             | 97 (9.3)   |
| Consumption of vegetables (daily) |            |
| >500g                             | 108 (10.4) |
| 300-500g                          | 554 (53.2) |
| <300g                             | 380 (36.5) |
| Consumption of fruits (daily)     |            |
| >350g                             | 95 (9.1)   |
| 200-350g                          | 394 (37.8) |
| <200g                             | 553 (53.1) |
| Dessert intake (daily)            |            |
| Never                             | 298 (28.6) |
| Occasionally                      | 686 (65.8) |
| Usual                             | 58 (5.6)   |
| Using anti-HP toothpaste          |            |
| Never                             | 941 (90.3) |
| Occasionally                      | 97 (9.3)   |
| Usual                             | 4 (0.4)    |
| Times of brushing teeth           |            |

|                                                                   |            |
|-------------------------------------------------------------------|------------|
| >3 times/day                                                      | 3 (0.3)    |
| 3 times/day                                                       | 51 (4.9)   |
| 2 times/day                                                       | 735 (70.5) |
| 1 time/day                                                        | 253 (24.3) |
| Drinking unboiled water (well or river water)                     |            |
| Never                                                             | 772 (74.1) |
| Occasionally                                                      | 219 (21.0) |
| Usual                                                             | 51 (4.9)   |
| Regular diet                                                      |            |
| Regular                                                           | 549 (52.7) |
| Suboptimal                                                        | 407 (39.1) |
| irregular                                                         | 86 (8.3)   |
| Eating out                                                        |            |
| Never                                                             | 55 (5.3)   |
| Occasionally                                                      | 784 (75.2) |
| Usual                                                             | 203 (19.5) |
| Group dining                                                      |            |
| Never                                                             | 74 (7.1)   |
| Occasionally                                                      | 550 (52.8) |
| Usual                                                             | 418 (40.1) |
| Use of serving spoons and chopsticks                              |            |
| Never                                                             | 422 (40.5) |
| Occasionally                                                      | 478 (45.9) |
| Usual                                                             | 142 (13.6) |
| Tableware disinfection                                            |            |
| 1 time/day                                                        | 198 (19.0) |
| 3-5 times/week                                                    | 114 (10.9) |
| 1-2 times/week                                                    | 270 (25.9) |
| Never                                                             | 460 (44.1) |
| Habit of washing hands before meals and after going to the toilet |            |
| Every time                                                        | 736 (70.6) |
| Usual                                                             | 225 (21.6) |
| Sometimes                                                         | 81 (7.8)   |
| Smoking                                                           |            |
| Never                                                             | 821 (78.8) |
| Ever                                                              | 81 (7.8)   |
| At present                                                        | 140 (13.4) |
| Drinking                                                          |            |
| Never                                                             | 674 (64.7) |
| Ever                                                              | 276 (26.5) |
| At present                                                        | 92 (8.8)   |

1

2 **Table 7 Bivariate analysis of factors associated with Helicobacter pylori infection**

16 / 27

1 (n=1042)

| Variable     | Helicobacter pylori infection |            | 95%CI          | P      |
|--------------|-------------------------------|------------|----------------|--------|
|              | Yes N (%)                     | No N (%)   |                |        |
| Eating out   |                               |            |                |        |
| Never        | 2 (12.5)                      | 14 (87.5)  | 0.322 to 0.816 | 0.005* |
| Occasionally | 84 (34.1)                     | 162 (65.9) |                |        |
| Usual        | 38 (49.4)                     | 39 (50.6)  |                |        |
| Group dining |                               |            |                |        |
| Never        | 7 (24.1)                      | 22 (75.9)  | 0.384 to 0.827 | 0.003* |
| Occasionally | 55 (30.7)                     | 124 (69.3) |                |        |
| Usual        | 62 (47.3)                     | 69 (52.7)  |                |        |

\*Statistically significant at P<0.05.

CI, confidence interval; OR, odds ratio.

## DISCUSSION

Understanding the general population's awareness and attitude towards HP screening can help to develop appropriate HP prevention and screening strategies. Most of the study participants had low awareness of HP, and few had received a HP test. However, most had a positive attitude towards HP screening. The main reasons for unwillingness to undertake a HP test included absence of symptoms and insufficient knowledge regarding the test's benefits.

### Knowledge of *Helicobacter pylori*

This study found that the general population has poor knowledge of HP; this is similar to findings for areas with high infection rates<sup>15,17,18,20,25</sup>. In a survey conducted in the United Arab Emirates, only 24.6% had heard of HP.<sup>25</sup> Wu et al., surveying Chinese physicians and members of the general population, reported that 35% were aware of the harmfulness of HP infection.<sup>15</sup> In surveys conducted in South Korea, 37.2% believed that HP does not cause symptoms of dyspepsia, most did not know about HP treatment methods,<sup>18</sup> and stress, rather than HP, was considered the biggest risk factor for GC.<sup>17</sup> In contrast, in a Singapore-based survey, where HP prevalence is low, 60% believed that gastropathy is associated with HP and 82.9% believed that the stomach is the site of HP infection.<sup>29</sup> In general, the present participants had good awareness of

1  
2  
3  
4 1 HP transmission and prevention methods, but a poor understanding of the harmfulness,  
5  
6 2 therapeutic benefits, treatment, testing, and the indications for screening and treatment  
7  
8 3 of HP infection. These results indicate that health education should focus on these  
9  
10 4 aspects. Further, 68.9% of the present participants reported having heard of HP. This is  
11  
12 5 higher than that reported in previous studies<sup>16,20</sup>, possibly because, in some areas in  
13  
14 6 China with a high GC incidence, efforts have been made to eradicate HP, and publicity  
15  
16 7 concerning GC and HP has increased public awareness.<sup>15,30</sup> A Ethiopia-based meta-  
17  
18 8 analysis<sup>31</sup> suggested that Ethiopia's decreasing trend in HP infections from 1990 to  
19  
20 9 2017 was related to relative improvements in public lifestyle and behavioural changes,  
21  
22 10 as well as increased awareness of the transmission, diagnosis, eradication, prevention,  
23  
24 11 and control of HP infection.

25  
26 12 Sociodemographic characteristics influence awareness of HP. Our study found  
27  
28 13 that men, undereducated participants and those who had never undertaken a HP test had  
29  
30 14 lower awareness. Women are more likely to assume the role of family caregivers than  
31  
32 15 men, participate in nursing services, pay attention to health knowledge, and, thus, gain  
33  
34 16 more knowledge about HP in this process<sup>32,33</sup>. Meanwhile, medical staff, students, and  
35  
36 17 people with higher education levels may have higher awareness because they have more  
37  
38 18 access to health education,<sup>34</sup> HP infection rate is closely related to socio-economic  
39  
40 19 status,<sup>35</sup> thus, health education interventions should focus on socially disadvantaged  
41  
42 20 individuals. Besides, after the HP test or treatment, people with or without HP infection  
43  
44 21 would gain more understanding of HP compared with those who have never undertake  
45  
46 22 HP test<sup>15,36</sup>. Studies<sup>15,25</sup> have mentioned that it is necessary to strengthen the general  
47  
48 23 population's knowledge of HP infection. In a qualitative study on the relationship  
49  
50 24 between GC and HP infection, participants voiced a strong desire for more, holistic,  
51  
52 25 health education.<sup>37</sup> Such education can be provided by hanging posters in popular  
53  
54 26 places, through social media, and through medical workers.<sup>15,37</sup>

55  
56 27 In the results of univariate analysis in this study, some health behaviours, such as  
57  
58 28 the using of serving spoons and chopsticks, eating out and group dining, were  
59  
60 29 significant with knowledge scores. Only drinking unboiled water was the influencing

1 factor of knowledge score in the results of multivariate analysis ( $P < 0.05$ ), but it was  
2 contrary to what we expected. We speculated that the reason might be that these  
3 participants were more confident that they were in good health,<sup>38</sup> and even though they  
4 know that drunk unboiled water was a risk factor for HP infection, they are not willing  
5 to change it. According to the Information-Motivation-Behavioral Skills model,<sup>39</sup> the  
6 change of behavior is affected not only by knowledge but also by motivation. This  
7 suggests that health interventions should not only improve people's knowledge of HP  
8 through health education, but also promote the formation of motivation for health  
9 behavioural change.

### 11 **Attitudes towards *Helicobacter pylori* screening**

12 Most participants had a positive attitude towards HP detection, but only 27.3% had  
13 undertaken a HP test. Similarly, in WU et al.<sup>15</sup> 87% of participants supported HP  
14 screening, but only 21.7% had been screened and in Shin et al.<sup>18</sup> most participants were  
15 willing to accept a HP 'detection and treatment' strategy for preventing GC, but only  
16 36.6% had undertaken a HP test. In a China-based study,<sup>20</sup> 81% of participants thought  
17 that they were not infected with HP, but, after testing, 41% were found to be infected.  
18 This relaxed attitude towards testing may be influenced by the manner by which HP  
19 causes GC: a multi-step process that may take decades, from chronic gastritis through  
20 atrophic gastritis, intestinal metaplasia, and atypical hyperplasia to GC.<sup>40</sup> During this  
21 process, HP infection can be asymptomatic, and may take many years for symptoms to  
22 appear.<sup>15</sup>

23 In this study, the primary reason for participants' reluctance to undertake a HP test  
24 was a lack of symptoms; this was not mentioned in previous studies. This is, however,  
25 similar to results from South Korea concerning gastroscopic screening for GC.<sup>17</sup> This  
26 attitude may be related to Chinese cultural beliefs that it is unnecessary to seek medical  
27 care when there are no obvious symptoms.<sup>41,42</sup> Most of the present participants said that  
28 their doctors had not discussed HP tests with them. This may be due to the poor health  
29 resources and heavy workloads of doctors, who have on average five-hour workloads



1 and 34.3 patients each,<sup>43,44</sup> doctors, due to excess patient workload, may prescribe a test  
2 or treatment rather than discuss the benefits of eradicating HP. Furthermore, the general  
3 population has poor knowledge of HP; thus, even if an individual has a positive attitude  
4 toward screening, the HP test remains in a state of passive acceptance (i.e. opportunistic  
5 screening, rather than active requirements).

6 The results of the multivariate analysis showed that occupation, monthly income,  
7 stomach discomfort symptoms status, diseases of the stomach and knowledge scores  
8 affect HP-detection behaviours. People with low monthly income were less likely to  
9 undertake a HP test than those with high monthly income. Interestingly, HP-infection  
10 risk is closely related to social status<sup>35,42</sup>. This may explain why, in this study, the  
11 detection rate among students, workers, and farmers was lower than that for other  
12 occupations; farmers and workers also have poor access to HP-screening information.<sup>45</sup>  
13 In contrast to individuals with no symptoms, people will seek medical care when they  
14 have symptoms of stomach discomfort or stomach-related diseases<sup>46</sup>. Participants with  
15 low knowledge scores were less likely to undertake HP testing because of inadequate  
16 awareness of HP risks; similarly, Wu's et al.<sup>15</sup> found that HP awareness affects the HP-  
17 screening rate. To improve the HP-screening rate, the general population's knowledge  
18 of HP should be improved, and targeted interventions should be conducted.  
19 Furthermore, health education should focus on those who are underserved and socially  
20 disadvantaged.

### 21 22 ***Helicobacter pylori* infection and health behaviours**

23 Some known risk factors and transmission routes of HP infection are associated with  
24 health behaviours.<sup>47</sup> Over half of the present participants had a daily fruit intake <200g,  
25 however, daily intake of >400g of vegetables or fruits is negatively correlated with HP  
26 infection.<sup>48</sup> Consuming fruits and vegetables can also reduce the risk of HP-associated  
27 stomach cancer.<sup>49</sup> Thus, medical professionals should encourage people to eat more  
28 fruits and vegetables. In this study, 24.3% of participants brushed their teeth only once  
29 a day, and 90.3% never used anti-HP toothpaste. The oral cavity can be a parasitic

1  
2  
3  
4 1 environment for HP<sup>50</sup>. In a China-based intervention study of individuals with oral  
5 2 HP,<sup>51</sup> using special toothpaste twice a day removed all oral HP from 31.03% (27/87) of  
6  
7 3 the participants. Therefore, medical workers should emphasised the importance of  
8  
9 4 eradicating HP from the oral microenvironment and maintaining oral hygiene.

11 5 The multivariate analysis results showed that the risk factors for HP infection are  
12 6 eating out and group dining; this is similar to previous findings.<sup>51,52</sup> Studies by Rosa  
13 7 Monno et.al showed that eating food from street vendors and eating out were associated  
14 8 with HP infection and may be related to poor hygiene.<sup>52</sup> Xu et al.<sup>51</sup> reported that poor  
15 9 hygiene habits, such as not using serving spoons and chopsticks and eating in groups  
16 10 increase the risk of HP infection. In China, the habit of not using serving spoons and  
17 11 chopsticks and eating in groups may play a very important role in HP infection and  
18 12 reinfection. A retrospective study<sup>53</sup> conducted in Hong Kong reported that the  
19 13 prevalence of HP among children declined in 2005–2017, which may have been due to  
20 14 increased use of serving spoons and chopsticks and a decline in adult infection rates.  
21 15 Thus, medical workers should strengthen the publicity and provision of health  
22 16 knowledge, and advocate the use of serving spoons and chopsticks for group dining.

### 18 **Taking one step forward**

19 19 In Japan, GC screening is incorporated into the national plan. In 2000, Japan's national  
20 20 health insurance began supporting HP eradication in patients with peptic ulcers, and in  
21 21 2013, HP-eradication treatment in patients with HP-positive chronic gastritis diagnosed  
22 22 by endoscopy was included in the national health insurance.<sup>54,55</sup> In recent years, the  
23 23 combination of primary prevention (through HP screening and eradication therapy) and  
24 24 secondary prevention (GC screening) has become a strong policy for GC prevention  
25 25 and control, and these medical-insurance policies have also achieved good results<sup>56,57</sup>.  
26 26 In China, the government has concerned public awareness of cancer, implemented the  
27 27 Three-year Action Plan for Cancer Prevention and Control in China (2015–2017), and  
28 28 explored HP-eradication treatment in areas with a high incidence of GC, which is a  
29 29 highly cost-effective approach.<sup>30</sup> However, there is little data regarding the

1 effectiveness of these measures. Therefore, this study's findings can represent a basis  
2 for measuring the effectiveness of further health interventions.

3 This study shows that the general population lacks awareness of HP, and that there  
4 are some misunderstandings and obstacles concerning HP screening and prevention.  
5 Therefore, we make the following suggestions: Firstly, for the prevention and control  
6 of GC, the government should consider combining primary prevention approaches with  
7 secondary prevention approaches and adding them to health insurance.<sup>56</sup> Second, a  
8 variety of methods such as the media should publicise scientific information regarding  
9 HP.<sup>42</sup> Third, community hospitals should strengthen health education for local people  
10 and provide community medical workers with full support for improving people's  
11 awareness of HP. Such health education should target the little-known risk factors and  
12 screening obstacles identified in this study. Additionally, health-education activities  
13 should focus on those with low incomes and poor knowledge. Fourthly, medical  
14 workers should strengthen the people's HP-prevention knowledge and promote their  
15 motivation to develop good health behaviours.

### 17 **Strengths and limitations**

18 This study investigated the general population's awareness and attitude toward HP,  
19 screening, as well as their engagement in associated health behaviours. The survey had  
20 a high response rate. However, this study had some limitations. First, as the participants'  
21 information was self-reported, recall bias may have been present. Second, some  
22 questions may have been subjective: for example, the demarcation of 'light', 'salty' and  
23 'very salty' was not clear, this could have been evaluated by considering daily salt  
24 intake. Third, regarding the screening of behavioural barriers, only quantitative research  
25 methods were adopted; thus, the research findings require further confirmation and  
26 support. Further studies should be conducted using qualitative or mixed methods.

### 28 **CONCLUSIONS**

29 This study shows that the general population has poor knowledge of HP, and that few

1 people have undertaken HP test. However, most people have a positive attitude toward  
2 HP screening. The main reasons for reluctance to take a test are being asymptomatic  
3 and having inadequate knowledge about the benefits of the test. Relevant health  
4 education and intervention measures should be implemented to improve, among the  
5 general population in China, awareness and screening rates of HP and recognition of  
6 the importance of a healthy lifestyle. Concurrently, reductions in doctors' workloads,  
7 training new doctors, and giving medical workers full support to provide health  
8 education, influence people's views on diseases, and advocate regular screening should  
9 be pursued.

### 11 **Conflict of interest**

12 The authors declare that they have no competing interests.

### 13 **Acknowledgement**

14 The authors thank all the participants in this study. We are grateful to Professor Shui-  
15 dong Feng on statistical consultation. We also gratefully acknowledge Professor De-  
16 liang Cao and Professor Qian Tao (The Chinese University of Hong Kong) for their  
17 advice with manuscript writing.

### 18 **Contributions**

19 Conceptualization, Ying Zeng, Xi Zeng, Ying-xin Wang and Jin-yu Zou; Data curation,  
20 Ying Zeng, Xi Zeng, Ying-xin Wang, Jin-yu Zou, Li-feng Hu; Investigation, Ying-xin  
21 Wang, Jin-yu Zou, Li-feng Hu, Qi Liu, Ruo-lin Huang, Tian Tang, Qian-qian Yue,  
22 Ying-xue Sun, Qiao Xiao; Methodology, Ying Zeng, Xi Zeng; Software, Qi Liu;  
23 Writing original draft, Ying Zeng, Ying-xin Wang, Jin-yu Zou; Writing review &  
24 editing, Ying Zeng, Xi Zeng.

### 25 **Date availability statement**

26 Date are available upon reasonable request. Date are available by contacting Ying Zeng  
27 by E-mail: zengying2003@126.com

### 28 **Funding**

29 This study was funded by the National Natural Science Foundation of China (NSFC),

1 Grant/Award number: 81641112; Hunan Provincial Natural Science Foundation of  
2 China, Grant/Award number: 2019JJ50521, 2019JJ40254; Hunan Excellent Young  
3 Teachers Fund, Grant/Award number: 2018191RQG010; Excellent Youth Project of  
4 Hunan Provincial Department of Education, Grant/Award number: 19B495; University  
5 of South China Innovation Foundation for Postgraduate, Grant/Award: 213YXC013;  
6 The University of South China Innovation & Entrepreneurship Foundation for  
7 Undergraduate, Grant/Award: 210XCX193; 210XCX195 . This work was also  
8 supported by the construction program of the key discipline in Hunan Province, Center  
9 for Gastric Cancer Research of Hunan Province and Key Laboratory of Tumour  
10 Cellular & Molecular Pathology ( Hengyang Medical School, University of South  
11 China).

## 15 REFERENCES

- 16 1. Parikh NS, Ahlawat R. Helicobacter Pylori. In: *StatPearls*. Treasure Island (FL): StatPearls  
17 Publishing Copyright © 2021, StatPearls Publishing LLC.; 2021.
- 18 2. Hooi JKY, Lai WY, Ng WK, et al. Global Prevalence of Helicobacter pylori Infection:  
19 Systematic Review and Meta-Analysis. *Gastroenterology*. 2017;153(2):420-429.
- 20 3. Mezmale L, Coelho LG, Bordin D, Leja M. Review: Epidemiology of Helicobacter pylori.  
21 *Helicobacter*. 2020;25 Suppl 1:e12734.
- 22 4. Zamani M, Ebrahimitabar F, Zamani V, et al. Systematic review with meta-analysis: the  
23 worldwide prevalence of Helicobacter pylori infection. *Alimentary Pharmacology &  
24 Therapeutics*. 2018;47(7):868-876.
- 25 5. Sung H, Ferlay J, Siegel RL, et al. Global Cancer Statistics 2020: GLOBOCAN Estimates  
26 of Incidence and Mortality Worldwide for 36 Cancers in 185 Countries. *CA: a cancer  
27 journal for clinicians*. 2021;71(3):209-249.
- 28 6. Wang FH, Shen L, Li J, et al. The Chinese Society of Clinical Oncology (CSCO): clinical  
29 guidelines for the diagnosis and treatment of gastric cancer. *Cancer communications  
30 (London, England)*. 2019;39(1):10.
- 31 7. Kentaro S, Jan T, J KE, et al. Kyoto global consensus report on Helicobacter pylori gastritis.  
32 *Gut*. 2015;64(9).
- 33 8. Ford AC, Yuan Y, Forman D, Hunt R, Moayyedi P. Helicobacter pylori eradication for the  
34 prevention of gastric neoplasia. *The Cochrane database of systematic reviews*.  
35 2020;7(7):Cd005583.
- 36 9. Ford AC, Yuan Y, Moayyedi P. Helicobacter pylori eradication therapy to prevent gastric

- 1  
2  
3  
4  
5  
6  
7  
8  
9  
10  
11  
12  
13  
14  
15  
16  
17  
18  
19  
20  
21  
22  
23  
24  
25  
26  
27  
28  
29  
30  
31  
32  
33  
34  
35  
36  
37  
38  
39  
40  
41  
42  
43  
44  
45  
46  
47  
48  
49  
50  
51  
52  
53  
54  
55  
56  
57  
58  
59  
60
- 1 cancer: systematic review and meta-analysis. *Gut*. 2020;69(12):2113-2121.
- 2 10. Kowada A, Asaka M. Economic and health impacts of introducing *Helicobacter pylori*  
3 eradication strategy into national gastric cancer policy in Japan: A cost-effectiveness  
4 analysis. *Helicobacter*. 2021;26(5):e12837.
- 5 11. Zong L, Abe M, Seto Y, Ji J. The challenge of screening for early gastric cancer in China.  
6 *Lancet (London, England)*. 2016;388(10060):2606.
- 7 12. Lapidot Y, Reshef L, Cohen D, Muhsen K. *Helicobacter pylori* and the intestinal  
8 microbiome among healthy school-age children. *Helicobacter*. 2021;26(6):e12854.
- 9 13. Chai KC, Zhang YB, Chang KC. Regional Disparity of Medical Resources and Its Effect  
10 on Mortality Rates in China. *Front Public Health*. 2020;8:8.
- 11 14. Tao W, Wang HX, Guo YF, Yang L, Li P. Establish a Scoring Model for High-Risk  
12 Population of Gastric Cancer and Study on the Pattern of Opportunistic Screening.  
13 *Gastroenterol Res Pract*. 2020;2020:5609623.
- 14 15. Wu Y, Su T, Zhou X, Lu N, Li Z, Du Y. Awareness and attitudes regarding *Helicobacter*  
15 *pylori* infection in Chinese physicians and public population: A national cross-sectional  
16 survey. *Helicobacter*. 2020;25(4):e12705.
- 17 16. Chen SY, Liu TS, Fan XM, et al. [Epidemiological study of *Helicobacter pylori* infection  
18 and its risk factors in Shanghai]. *Zhonghua yi xue za zhi*. 2005;85(12):802-806.
- 19 17. Oh D-Y, Choi KS, Shin H-R, Bang Y-J. Public Awareness of Gastric Cancer Risk Factors  
20 and Disease Screening in a High Risk Region: A Population-Based Study. *Cancer Research  
21 and Treatment*. 2009;41(2).
- 22 18. Shin DW, Cho J, Kim SH, et al. Preferences for the “screen and treat” Strategy  
23 of *Helicobacter pylori* to Prevent Gastric Cancer in Healthy Korean Populations.  
24 *Helicobacter*. 2013;18(4):262-269.
- 25 19. Wynne A, Hastings EV, Colquhoun A, Chang H-J, Goodman KJ, Grp CAW. Untreated  
26 water and *Helicobacter pylori*: perceptions and behaviors in a Northern Canadian  
27 community. *International Journal of Circumpolar Health*. 2013;72:704-705.
- 28 20. Xia P, Ma MF, Wang W. Status of *Helicobacter pylori* infection among migrant workers  
29 in Shijiazhuang, China. *Asian Pacific journal of cancer prevention : APJCP*.  
30 2012;13(4):1167-1170.
- 31 21. Sharma VK, Bailey DM, Raufman JP, et al. A survey of internal medicine residents'  
32 knowledge about *Helicobacter pylori* infection. *The American journal of gastroenterology*.  
33 2000;95(8):1914-1919.
- 34 22. Liu Q, Zeng X, Wang W, et al. Awareness of risk factors and warning symptoms and  
35 attitude towards gastric cancer screening among the general public in China: a cross-  
36 sectional study. *BMJ open*. 2019;9(7):e029638.
- 37 23. Hajian-Tilaki K. Sample size estimation in epidemiologic studies. *Caspian J Intern Med*.  
38 2011;2(4):289-298.
- 39 24. Liu WZ, Xie Y, Lu H, et al. Fifth Chinese National Consensus Report on the management  
40 of *Helicobacter pylori* infection. *Helicobacter*. 2018;23(2):e12475.
- 41 25. Malek AI, Abdelbagi M, Odeh L, Alotaibi AT, Alfardan MH, Barqawi HJ. Knowledge,  
42 Attitudes and Practices of Adults in the United Arab Emirates Regarding *Helicobacter*  
43 *pylori* induced Gastric Ulcers and Cancers. *Asian Pacific journal of cancer prevention :  
44 APJCP*. 2021;22(5):1645-1652.

- 1  
2  
3 1 26. Li J, Qiu J, Lv L, et al. Paternal factors and adverse birth outcomes in Lanzhou, China.  
4 2 *BMC pregnancy and childbirth*. 2021;21(1):19.  
5 3 27. Pan Y, Chen R, Li Z, et al. Socioeconomic Status and the Quality of Acute Stroke Care:  
6 4 The China National Stroke Registry. *Stroke*. 2016;47(11):2836-2842.  
7 5 28. Wang SS, Lay S, Yu HN, Shen SR. Dietary Guidelines for Chinese Residents (2016):  
8 6 comments and comparisons. *Journal of Zhejiang University Science B*. 2016;17(9):649-  
9 7 656.  
10 8 29. Teng TZJ, Sudharsan M, Yau JWK, Tan W, Shelat VG. Helicobacter pylori knowledge and  
11 9 perception among multi-ethnic Asians. *Helicobacter*. 2021;26(3):e12794.  
12 10 30. Li WQ, Zhang JY, Ma JL, et al. Effects of Helicobacter pylori treatment and vitamin and  
13 11 garlic supplementation on gastric cancer incidence and mortality: follow-up of a  
14 12 randomized intervention trial. *BMJ (Clinical research ed)*. 2019;366:l5016.  
15 13 31. Melese A, Genet C, Zeleke B, Andualem T. Helicobacter pylori infections in Ethiopia;  
16 14 prevalence and associated factors: a systematic review and meta-analysis. *BMC*  
17 15 *Gastroenterol*. 2019;19(1):8.  
18 16 32. Qin L, Xu H. A cross-sectional study of the effect of health literacy on diabetes prevention  
19 17 and control among elderly individuals with prediabetes in rural China. *BMJ open*.  
20 18 2016;6(5):e011077.  
21 19 33. Sara, Arber, BSc, et al. Gender differences in informal caring. *Health & Social Care in the*  
22 20 *Community*. 2007;3(1):19-31.  
23 21 34. Huang RL, Liu Q, Wang YX, et al. Awareness, attitude and barriers of colorectal cancer  
24 22 screening among high-risk populations in China: a cross-sectional study. *BMJ open*.  
25 23 2021;11(7):e045168.  
26 24 35. Inoue M. Changing epidemiology of Helicobacter pylori in Japan. *Gastric cancer : official*  
27 25 *journal of the International Gastric Cancer Association and the Japanese Gastric Cancer*  
28 26 *Association*. 2017;20(Suppl 1):3-7.  
29 27 36. Emmons KM, Colditz GA. Realizing the Potential of Cancer Prevention - The Role of  
30 28 Implementation Science. *The New England journal of medicine*. 2017;376(10):986-990.  
31 29 37. Chief C, Sanderson PR, Willetto AAA, et al. "Nobody Is Talking About It": Diné (Navajo)  
32 30 Communities Speak About Stomach Cancer and Helicobacter pylori Infections. *Journal of*  
33 31 *cancer education : the official journal of the American Association for Cancer Education*.  
34 32 2020.  
35 33 38. Deng SX, Gao J, An W, et al. Colorectal cancer screening behavior and willingness: an  
36 34 outpatient survey in China. *World journal of gastroenterology*. 2011;17(26):3133-3139.  
37 35 39. Fisher WA, Fisher JD, Harman J. *The Information-Motivation-Behavioral Skills Model: A*  
38 36 *General Social Psychological Approach to Understanding and Promoting Health Behavior*.  
39 37 Blackwell Publishing Ltd; 2003.  
40 38 40. Driscoll LJ, Brown HE, Harris RB, Oren E. Population Knowledge, Attitude, and Practice  
41 39 Regarding Helicobacter pylori Transmission and Outcomes: A Literature Review.  
42 40 *Frontiers in Public Health*. 2017;5.  
43 41 41. Jung MY, Holt CL, Ng D, et al. The Chinese and Korean American immigrant experience:  
44 42 a mixed-methods examination of facilitators and barriers of colorectal cancer screening.  
45 43 *Ethnicity & health*. 2018;23(8):847-866.  
46 44 42. Sin MK, Kim IH. Facilitators of and Barriers to Gastric Cancer Screening Among Korean

- 1  
2  
3  
4  
5  
6  
7  
8  
9  
10  
11  
12  
13  
14  
15  
16  
17  
18  
19  
20  
21  
22  
23  
24  
25  
26  
27  
28  
29  
30  
31  
32  
33  
34  
35  
36  
37  
38  
39  
40  
41  
42  
43  
44  
45  
46  
47  
48  
49  
50  
51  
52  
53  
54  
55  
56  
57  
58  
59  
60
- 1 Americans. *Cancer nursing*. 2017;40(4):E59-e65.
- 2 43. Nie Y, Wu K, Yu J, et al. A global burden of gastric cancer: the major impact of China.  
3 *Expert review of gastroenterology & hepatology*. 2017;11(7):651-661.
- 4 44. Guan X, Ni B, Zhang J, et al. Association Between Physicians' Workload and Prescribing  
5 Quality in One Tertiary Hospital in China. *Journal of patient safety*. 2020.
- 6 45. White A, Thompson TD, White MC, et al. Cancer Screening Test Use - United States,  
7 2015. *MMWR Morbidity and mortality weekly report*. 2017;66(8):201-206.
- 8 46. Sin MK, Ha A, Taylor V. Sociocultural Barriers to Lung Cancer Screening Among Korean  
9 Immigrant Men. *Journal of community health*. 2016;41(4):790-797.
- 10 47. Leja M, Grinberga-Derica I, Bilgiler C, Steininger C. Review: Epidemiology of  
11 *Helicobacter pylori* infection. *Helicobacter*. 2019;24 Suppl 1:e12635.
- 12 48. Razuka-Ebela D, Polaka I, Parshutin S, et al. Sociodemographic, Lifestyle and Medical  
13 Factors Associated with *Helicobacter Pylori* Infection. *Journal of gastrointestinal and liver*  
14 *diseases : JGLD*. 2020;29(3):319-327.
- 15 49. Wang T, Cai H, Sasazuki S, et al. Fruit and vegetable consumption, *Helicobacter pylori*  
16 antibodies, and gastric cancer risk: A pooled analysis of prospective studies in China, Japan,  
17 and Korea. *International journal of cancer*. 2017;140(3):591-599.
- 18 50. Gebara EC, Faria CM, Pannuti C, Chehter L, Mayer MP, Lima LA. Persistence of  
19 *Helicobacter pylori* in the oral cavity after systemic eradication therapy. *Journal of clinical*  
20 *periodontology*. 2006;33(5):329-333.
- 21 51. Xu YE, Li SX, Gao X, Wang XP. [Risk factors of oral *Helicobacter pylori* infection among  
22 children in two kindergartens in Suzhou and the effects of oral cleaning on reducing oral  
23 *Helicobacter pylori* infection]. *Hua xi kou qiang yi xue za zhi = Huaxi kouqiang yixue zazhi*  
24 = *West China journal of stomatology*. 2019;37(1):70-75.
- 25 52. Monno R, De Laurentiis V, Trerotoli P, Roselli AM, Ierardi E, Portincasa P. *Helicobacter*  
26 *pylori* infection: association with dietary habits and socioeconomic conditions. *Clinics and*  
27 *research in hepatology and gastroenterology*. 2019;43(5):603-607.
- 28 53. Tang MYL, Chung PHY, Chan HY, Tam PKH, Wong KK. Recent trends in the prevalence  
29 of *Helicobacter Pylori* in symptomatic children: A 12-year retrospective study in a tertiary  
30 centre. *Journal of pediatric surgery*. 2019;54(2):255-257.
- 31 54. Asaka M, Kato M, Takahashi S, et al. Guidelines for the management of *Helicobacter pylori*  
32 infection in Japan: 2009 revised edition. *Helicobacter*. 2010;15(1):1-20.
- 33 55. Asaka M, Mabe K, Matsushima R, Tsuda M. *Helicobacter pylori* Eradication to Eliminate  
34 Gastric Cancer: The Japanese Strategy. *Gastroenterology clinics of North America*.  
35 2015;44(3):639-648.
- 36 56. Hiroi S, Sugano K, Tanaka S, Kawakami K. Impact of health insurance coverage for  
37 *Helicobacter pylori* gastritis on the trends in eradication therapy in Japan: retrospective  
38 observational study and simulation study based on real-world data. *BMJ open*.  
39 2017;7(7):e015855.
- 40 57. Sugano K. Strategies for Prevention of Gastric Cancer: Progress from Mass Eradication  
41 Trials. *Digestive diseases (Basel, Switzerland)*. 2016;34(5):500-504.



STROBE Statement—Checklist of items that should be included in reports of *cross-sectional studies*

|                              | Item No | Recommendation                                                                                                                                                                                    | Page No |
|------------------------------|---------|---------------------------------------------------------------------------------------------------------------------------------------------------------------------------------------------------|---------|
| <b>Title and abstract</b>    | 1       | (a) Indicate the study's design with a commonly used term in the title or the abstract                                                                                                            | 3       |
|                              |         | (b) Provide in the abstract an informative and balanced summary of what was done and what was found                                                                                               | 3       |
| <b>Introduction</b>          |         |                                                                                                                                                                                                   |         |
| Background/rationale         | 2       | Explain the scientific background and rationale for the investigation being reported                                                                                                              | 4-5     |
| Objectives                   | 3       | State specific objectives, including any prespecified hypotheses                                                                                                                                  | 5       |
| <b>Methods</b>               |         |                                                                                                                                                                                                   |         |
| Study design                 | 4       | Present key elements of study design early in the paper                                                                                                                                           | 5       |
| Setting                      | 5       | Describe the setting, locations, and relevant dates, including periods of recruitment, exposure, follow-up, and data collection                                                                   | 5-6     |
| Participants                 | 6       | (a) Give the eligibility criteria, and the sources and methods of selection of participants                                                                                                       | 5-7     |
| Variables                    | 7       | Clearly define all outcomes, exposures, predictors, potential confounders, and effect modifiers. Give diagnostic criteria, if applicable                                                          | 6-7     |
| Data sources/<br>measurement | 8*      | For each variable of interest, give sources of data and details of methods of assessment (measurement). Describe comparability of assessment methods if there is more than one group              | 6-7     |
| Bias                         | 9       | Describe any efforts to address potential sources of bias                                                                                                                                         | 6-7     |
| Study size                   | 10      | Explain how the study size was arrived at                                                                                                                                                         | 5       |
| Quantitative variables       | 11      | Explain how quantitative variables were handled in the analyses. If applicable, describe which groupings were chosen and why                                                                      | 7       |
| Statistical methods          | 12      | (a) Describe all statistical methods, including those used to control for confounding                                                                                                             | 7       |
|                              |         | (b) Describe any methods used to examine subgroups and interactions                                                                                                                               |         |
|                              |         | (c) Explain how missing data were addressed                                                                                                                                                       | 8       |
|                              |         | (d) If applicable, describe analytical methods taking account of sampling strategy                                                                                                                |         |
|                              |         | (e) Describe any sensitivity analyses                                                                                                                                                             | 7       |
| <b>Results</b>               |         |                                                                                                                                                                                                   |         |
| Participants                 | 13*     | (a) Report numbers of individuals at each stage of study—eg numbers potentially eligible, examined for eligibility, confirmed eligible, included in the study, completing follow-up, and analysed | 8       |
|                              |         | (b) Give reasons for non-participation at each stage                                                                                                                                              |         |
|                              |         | (c) Consider use of a flow diagram                                                                                                                                                                |         |
| Descriptive data             | 14*     | (a) Give characteristics of study participants (eg demographic, clinical, social) and information on exposures and potential confounders                                                          | 8-10    |
|                              |         | (b) Indicate number of participants with missing data for each variable of interest                                                                                                               |         |
| Outcome data                 | 15*     | Report numbers of outcome events or summary measures                                                                                                                                              | 10-19   |

1  
2  
3  
4  
5  
6  
7  
8  
9  
10  
11  
12  
13  
14  
15  
16  
17  
18  
19  
20  
21  
22  
23  
24  
25  
26  
27  
28  
29  
30  
31  
32  
33  
34  
35  
36  
37  
38  
39  
40  
41  
42  
43  
44  
45  
46  
47  
48  
49  
50  
51  
52  
53  
54  
55  
56  
57  
58  
59  
60

|                          |    |                                                                                                                                                                                                              |               |
|--------------------------|----|--------------------------------------------------------------------------------------------------------------------------------------------------------------------------------------------------------------|---------------|
| Main results             | 16 | (a) Give unadjusted estimates and, if applicable, confounder-adjusted estimates and their precision (eg, 95% confidence interval). Make clear which confounders were adjusted for and why they were included | 11,<br>14, 17 |
|                          |    | (b) Report category boundaries when continuous variables were categorized                                                                                                                                    | 5, 15         |
|                          |    | (c) If relevant, consider translating estimates of relative risk into absolute risk for a meaningful time period                                                                                             |               |
| Other analyses           | 17 | Report other analyses done—eg analyses of subgroups and interactions, and sensitivity analyses                                                                                                               | 11,<br>14, 17 |
| <b>Discussion</b>        |    |                                                                                                                                                                                                              |               |
| Key results              | 18 | Summarise key results with reference to study objectives                                                                                                                                                     | 19            |
| Limitations              | 19 | Discuss limitations of the study, taking into account sources of potential bias or imprecision. Discuss both direction and magnitude of any potential bias                                                   | 24            |
| Interpretation           | 20 | Give a cautious overall interpretation of results considering objectives, limitations, multiplicity of analyses, results from similar studies, and other relevant evidence                                   | 19-23         |
| Generalisability         | 21 | Discuss the generalisability (external validity) of the study results                                                                                                                                        | 23-24         |
| <b>Other information</b> |    |                                                                                                                                                                                                              |               |
| Funding                  | 22 | Give the source of funding and the role of the funders for the present study and, if applicable, for the original study on which the present article is based                                                | 25-26         |

\*Give information separately for exposed and unexposed groups.

**Note:** An Explanation and Elaboration article discusses each checklist item and gives methodological background and published examples of transparent reporting. The STROBE checklist is best used in conjunction with this article (freely available on the Web sites of PLoS Medicine at <http://www.plosmedicine.org/>, Annals of Internal Medicine at <http://www.annals.org/>, and Epidemiology at <http://www.epidem.com/>). Information on the STROBE Initiative is available at [www.strobe-statement.org](http://www.strobe-statement.org).
